# Supplementary material
Source: ML conference proceedings conference paper supplement (https://openaccess.thecvf.com/content/CVPR2024/html/Lee_AETTA_Label-Free_Accuracy_CVPR_2024_paper.html)
Supplement: Supplementary file [file Lee_AETTA_Label-Free_Accuracy_CVPR_2024_supplemental.pdf]

# AETTA: Label-Free Accuracy Estimation for Test-Time Adaptation

## Supplementary Material

### A. Proof of Theorems

#### A.1. Proof of Theorem 3.1

We start expanding test error  $\text{Err}$  with few modifications from GDE [21]:

$$\mathbb{E}_{h \sim \mathcal{H}_A}[\text{Err}_{\mathcal{D}\mathcal{T}}(h)] \tag{14}$$

$$\triangleq \mathbb{E}_{\mathcal{H}_A}[\mathbb{E}_{\mathcal{D}\mathcal{T}}[\mathbb{1}(h(X; \Theta) \neq Y)]] \tag{15}$$

$$= \mathbb{E}_{\mathcal{D}\mathcal{T}}[\mathbb{E}_{\mathcal{H}_A}[\mathbb{1}(h(X; \Theta) \neq Y)]] \tag{16}$$

(exchanging expectations)

$$= \mathbb{E}_{\mathcal{D}\mathcal{T}}[1 - \tilde{h}_Y(X)] \tag{17}$$

$$= \sum_{k=0}^{K-1} \int_{\mathbf{x}} (1 - \tilde{h}_k(\mathbf{x})) p(X = \mathbf{x}, Y = k) d\mathbf{x} \tag{18}$$

(by definition of expectation)

$$= \int_{\mathbf{q} \in \Delta^K} \sum_{k=0}^{K-1} \int_{\mathbf{x}} (1 - \tilde{h}_k(\mathbf{x})) p(X = \mathbf{x}, Y = k, \tilde{h}(X) = \mathbf{q}) d\mathbf{x} d\mathbf{q} \tag{19}$$

(introducing  $\tilde{h}$  as a r.v.)

$$= \int_{\mathbf{q} \in \Delta^K} \sum_{k=0}^{K-1} \int_{\mathbf{x}} (1 - \tilde{h}_k(\mathbf{x})) p(Y = k, \tilde{h}(X) = \mathbf{q}) p(X = \mathbf{x} | Y = k, \tilde{h}(X) = \mathbf{q}) d\mathbf{x} d\mathbf{q} \tag{20}$$

$$= \int_{\mathbf{q} \in \Delta^K} \sum_{k=0}^{K-1} p(Y = k, \tilde{h}(X) = \mathbf{q}) \int_{\mathbf{x}} \underbrace{(1 - \tilde{h}_k(\mathbf{x}))}_{=q_k} p(X = \mathbf{x} | Y = k, \tilde{h}(X) = \mathbf{q}) d\mathbf{x} d\mathbf{q} \tag{21}$$

$$= \int_{\mathbf{q} \in \Delta^K} \sum_{k=0}^{K-1} p(Y = k, \tilde{h}(X) = \mathbf{q}) \int_{\mathbf{x}} \underbrace{(1 - q_k)}_{\text{constant w.r.t. } \int_{\mathbf{x}}} p(X = \mathbf{x} | Y = k, \tilde{h}(X) = \mathbf{q}) d\mathbf{x} d\mathbf{q} \tag{22}$$

$$= \int_{\mathbf{q} \in \Delta^K} \sum_{k=0}^{K-1} p(Y = k, \tilde{h}(X) = \mathbf{q}) \underbrace{(1 - q_k) \int_{\mathbf{x}} p(X = \mathbf{x} | Y = k, \tilde{h}(X) = \mathbf{q}) d\mathbf{x}}_{=1} d\mathbf{q} \tag{23}$$

$$= \int_{\mathbf{q} \in \Delta^K} \sum_{k=0}^{K-1} p(Y = k, \tilde{h}(X) = \mathbf{q}) (1 - q_k) d\mathbf{q} \tag{24}$$

$$= \int_{q \in [0,1]} \sum_{k=0}^{K-1} p(Y = k, \tilde{h}_k(X) = q) (1 - q) dq \tag{25}$$

(refer [21])

$$= \int_{q \in [0,1]} \sum_{k=0}^{K-1} \underbrace{p(Y = k | \tilde{h}_k(X) = q)}_{=q} p(\tilde{h}_k(X) = q) (1 - q) dq \tag{26}$$

$$= \int_{q \in [0,1]} q(1 - q) \sum_{k=0}^{K-1} p(\tilde{h}_k(X) = q) dq. \tag{27}$$

(confidence-prediction calibration)

Then, we expand the prediction disagreement with dropouts (PDD) from its definition:

$$\mathbb{E}_{h \sim \mathcal{H}_{\mathcal{A}}} [\text{PDD}_{\mathcal{D}\mathcal{T}}(h)] \quad (28)$$

$$\triangleq \mathbb{E}_{\mathcal{H}_{\mathcal{A}}} \left[ \mathbb{E}_{\mathcal{D}\mathcal{T}} \left[ \frac{1}{N} \sum_{i=1}^N \mathbb{1}[h(X; \Theta) \neq h(X; \Theta^{\text{dropout}_i})] \right] \right] \quad (29)$$

$$= \mathbb{E}_{\mathcal{D}\mathcal{T}} \left[ \mathbb{E}_{\mathcal{H}_{\mathcal{A}}} \left[ \frac{1}{N} \sum_{i=1}^N \mathbb{1}[h(X; \Theta) \neq h(X; \Theta^{\text{dropout}_i})] \right] \right] \quad (\text{exchanging expectations}) \quad (30)$$

$$= \mathbb{E}_{\mathcal{D}\mathcal{T}} \left[ \mathbb{E}_{\mathcal{H}_{\mathcal{A}}} \left[ \frac{1}{N} \sum_{i=1}^N \sum_{k=0}^{K-1} \mathbb{1}[h(X; \Theta) = k] (1 - \mathbb{1}[h(X; \Theta^{\text{dropout}_i}) = k]) \right] \right] \quad (31)$$

$$= \mathbb{E}_{\mathcal{D}\mathcal{T}} \left[ \sum_{k=0}^{K-1} \frac{1}{N} \sum_{i=1}^N \mathbb{E}_{\mathcal{H}_{\mathcal{A}}} [\mathbb{1}[h(X; \Theta) = k] (1 - \mathbb{1}[h(X; \Theta^{\text{dropout}_i}) = k])] \right] \quad (32)$$

$$= \mathbb{E}_{\mathcal{D}\mathcal{T}} \left[ \sum_{k=0}^{K-1} \mathbb{E}_{\mathcal{H}_{\mathcal{A}}} [\mathbb{1}[h(X; \Theta) = k]] \mathbb{E}_{\mathcal{H}_{\mathcal{A}}} [1 - \frac{1}{N} \sum_{i=1}^N \mathbb{1}[h(X; \Theta^{\text{dropout}_i}) = k]] \right] \quad (\text{Dropout independence (Definition 3.1)}) \quad (33)$$

$$= \mathbb{E}_{\mathcal{D}\mathcal{T}} \left[ \sum_{k=0}^{K-1} \tilde{h}_k(X) (1 - \tilde{h}_k(X)) \right] \quad (34)$$

$$= \int_{\mathbf{x}} \sum_{k=0}^{K-1} \tilde{h}_k(\mathbf{x}) (1 - \tilde{h}_k(\mathbf{x})) p(X = \mathbf{x}) d\mathbf{x} \quad (\text{by definition of expectation}) \quad (35)$$

$$= \int_{\mathbf{q} \in \Delta^K} \int_{\mathbf{x}} \sum_{k=0}^{K-1} \tilde{h}_k(\mathbf{x}) (1 - \tilde{h}_k(\mathbf{x})) p(X = \mathbf{x}, \tilde{h}(X) = \mathbf{q}) d\mathbf{x} d\mathbf{q} \quad (\text{introducing } \tilde{h} \text{ as a r.v.}) \quad (36)$$

$$= \int_{\mathbf{q} \in \Delta^K} p(\tilde{h}(X) = \mathbf{q}) \int_{\mathbf{x}} \underbrace{\sum_{k=0}^{K-1} \tilde{h}_k(\mathbf{x}) (1 - \tilde{h}_k(\mathbf{x}))}_{\tilde{h}_k(\mathbf{x}) = q_k} p(X = \mathbf{x} | \tilde{h}(X) = \mathbf{q}) d\mathbf{x} d\mathbf{q} \quad (37)$$

$$= \int_{\mathbf{q} \in \Delta^K} p(\tilde{h}(X) = \mathbf{q}) \int_{\mathbf{x}} \underbrace{\sum_{k=0}^{K-1} q_k (1 - q_k)}_{\text{bring to the front}} p(X = \mathbf{x} | \tilde{h}(X) = \mathbf{q}) d\mathbf{x} d\mathbf{q} \quad (38)$$

$$= \sum_{k=0}^{K-1} \int_{\mathbf{q} \in \Delta^K} p(\tilde{h}(X) = \mathbf{q}) \int_{\mathbf{x}} \underbrace{q_k (1 - q_k)}_{\text{constant w.r.t. } \int_{\mathbf{x}}} p(X = \mathbf{x} | \tilde{h}(X) = \mathbf{q}) d\mathbf{x} d\mathbf{q} \quad (39)$$

$$= \underbrace{\sum_{k=0}^{K-1} \int_{\mathbf{q} \in \Delta^K} p(\tilde{h}(X) = \mathbf{q}) q_k (1 - q_k)}_{\text{swap}} \underbrace{\int_{\mathbf{x}} p(X = \mathbf{x} | \tilde{h}(X) = \mathbf{q}) d\mathbf{x}}_{=1} d\mathbf{q} \quad (40)$$

$$= \int_{\mathbf{q} \in \Delta^K} \sum_{k=0}^{K-1} q_k (1 - q_k) p(\tilde{h}(X) = \mathbf{q}) d\mathbf{q} \quad (41)$$

$$= \int_{q \in [0,1]} q(1-q) \sum_{k=0}^{K-1} p(\tilde{h}_k(X) = q) dq. \quad (\text{refer [21]}) \quad (42)$$

Equation 27 is equivalent to Equation 42:

$$\mathbb{E}_{h \sim \mathcal{H}_A} [\mathbf{Err}_{\mathcal{D}\tau}(h)] = \mathbb{E}_{h \sim \mathcal{H}_A} [\mathbf{PDD}_{\mathcal{D}\tau}(h)], \quad (43)$$

which concludes the proof of Theorem 3.1.

## A.2. Proof of Theorem 3.2

From robust confidence-prediction calibration, the over-confident model's conditional probability of the major class  $k'$  is scaled by  $a$ , while other classes' conditional probabilities are equally scaled up by  $b$ . Then, Equation 27 now becomes:

$$\mathbb{E}_{h \sim \mathcal{H}_A} [\mathbf{Err}_{\mathcal{D}\tau}(h)] \quad (44)$$

$$= \int_{q \in [0,1]} \sum_{k=0}^{K-1} p(Y = k | \tilde{h}_k(X) = q) p(\tilde{h}_k(X) = q) (1 - q) dq \quad (45)$$

$$= \int_{q \in [0,1]} p(Y = k' | \tilde{h}_{k'}(X) = q) p(\tilde{h}_{k'}(X) = q) (1 - q) + \sum_{k \neq k'} p(Y = k | \tilde{h}_k(X) = q) p(\tilde{h}_k(X) = q) (1 - q) dq \quad (46)$$

$$= \int_{q \in [0,1]} aq p(\tilde{h}_{k'}(X) = q) (1 - q) + \sum_{k \neq k'} bq p(\tilde{h}_k(X) = q) (1 - q) dq \quad (47)$$

(robust confidence-prediction calibration)

$$= \int_{q \in [0,1]} aq(1 - q) p(\tilde{h}_{k'}(X) = q) dq + b \int_{q \in [0,1]} \sum_{k \neq k'} q(1 - q) p(\tilde{h}_k(X) = q) dq. \quad (48)$$

We rewrite Equation 48 as:

$$\int_{q \in [0,1]} \sum_{k \neq k'} q(1 - q) p(\tilde{h}_k(X) = q) dq = \frac{1}{b} \mathbb{E}_{h \sim \mathcal{H}_A} [\mathbf{Err}_{\mathcal{D}\tau}(h)] - \int_{q \in [0,1]} \frac{a}{b} q(1 - q) p(\tilde{h}_{k'}(X) = q) dq. \quad (49)$$

Then, we rewrite PDD (Equation 42):

$$\mathbb{E}_{h \sim \mathcal{H}_A} [\mathbf{PDD}_{\mathcal{D}\tau}(h)] \quad (50)$$

$$= \int_{q \in [0,1]} q(1 - q) \sum_{k=0}^{K-1} p(\tilde{h}_k(X) = q) dq \quad (51)$$

$$= \int_{q \in [0,1]} q(1 - q) p(\tilde{h}_{k'}(X) = q) + q(1 - q) \sum_{k \neq k'} p(\tilde{h}_k(X) = q) dq \quad (52)$$

$$= \int_{q \in [0,1]} q(1 - q) p(\tilde{h}_{k'}(X) = q) dq + \int_{q \in [0,1]} q(1 - q) \sum_{k \neq k'} p(\tilde{h}_k(X) = q) dq \quad (53)$$

$$= \int_{q \in [0,1]} \frac{b - a}{b} q(1 - q) p(\tilde{h}_{k'}(X) = q) dq + \frac{1}{b} \mathbb{E}_{h \sim \mathcal{H}_A} [\mathbf{Err}_{\mathcal{D}\tau}(h)]. \quad (\text{Equation 49}) \quad (54)$$

Finally, we obtain the equality between Err and PDD:

$$\mathbb{E}_{h \sim \mathcal{H}_A} [\mathbf{Err}_{\mathcal{D}\tau}(h)] \quad (55)$$

$$= b \mathbb{E}_{h \sim \mathcal{H}_A} [\mathbf{PDD}_{\mathcal{D}\tau}(h)] - \int_{q \in [0,1]} (b - a) q(1 - q) p(\tilde{h}_{k'}(X) = q) dq, \quad (56)$$

which concludes the proof of Theorem 3.2. Note that without weighting ( $a = b = 1$ ), the result is identical to Theorem 3.1.

## B. Additional Experiments

**GDE with multiple pre-trained models.** We compare AETTA with the original version of GDE (denoted as GDE\*), utilizing multiple pre-trained models with access to training data. We report the result in Table 4. Due to the misalignment of confidence-prediction calibration, GDE\* underperforms AETTA even with full access to source data.

Table 4. Mean absolute error (MAE) (%) of the accuracy estimation on continual CIFAR100-C.

| Dataset    | Method    | TTA Method   |             |             |             |             |             | Avg. (↓)           |
|------------|-----------|--------------|-------------|-------------|-------------|-------------|-------------|--------------------|
|            |           | TENT [34]    | EATA [28]   | SAR [29]    | CoTTA [35]  | RoTTA [36]  | SoTTA [12]  |                    |
| Continual  | GDE* [21] | 14.54 ± 8.14 | 4.11 ± 2.43 | 7.27 ± 0.16 | 9.89 ± 0.29 | 7.44 ± 0.13 | 5.79 ± 0.23 | 8.17 ± 0.87        |
| CIFAR100-C | AETTA     | 5.85 ± 0.36  | 4.18 ± 0.82 | 6.67 ± 0.12 | 6.55 ± 0.17 | 5.86 ± 0.10 | 5.32 ± 0.18 | <b>5.74 ± 0.13</b> |

**ImageNet-R.** To demonstrate the dataset generality of AETTA, we report the accuracy estimation result on ResNet18 architecture on ImageNet-R (Table 5). AETTA outperformed the baselines in all TTA methods, showing AETTA is applicable in various datasets (e.g., CIFAR10-C, CIFAR100-C, ImageNet-C, and ImageNet-R).

Table 5. Mean absolute error (MAE) (%) of the accuracy estimation on ResNet18 on ImageNet-R. **Bold** numbers are the lowest error. Averaged over three different random seeds.

| Dataset    | Method           | TTA Method   |              |              |              |              |              | Avg. (↓)           |
|------------|------------------|--------------|--------------|--------------|--------------|--------------|--------------|--------------------|
|            |                  | TENT [34]    | EATA [28]    | SAR [29]     | CoTTA [35]   | RoTTA [36]   | SoTTA [12]   |                    |
| ImageNet-R | SrcValid         | 37.00 ± 0.14 | 37.91 ± 0.18 | 36.58 ± 0.24 | 35.05 ± 0.16 | 34.43 ± 0.05 | 37.82 ± 0.41 | 36.46 ± 0.05       |
|            | SoftmaxScore [7] | 10.79 ± 0.17 | 13.87 ± 0.09 | 15.02 ± 0.14 | 14.76 ± 0.07 | 14.08 ± 0.04 | 12.25 ± 0.42 | 13.46 ± 0.06       |
|            | GDE [21]         | 62.81 ± 0.12 | 61.36 ± 0.14 | 63.27 ± 0.18 | 64.86 ± 0.10 | 62.64 ± 0.12 | 55.23 ± 0.29 | 61.70 ± 0.02       |
|            | AdvPerturb [23]  | 13.42 ± 0.28 | 16.04 ± 0.36 | 17.90 ± 0.28 | 21.19 ± 0.22 | 31.12 ± 0.12 | 9.91 ± 0.73  | 18.26 ± 0.03       |
|            | AETTA            | 8.02 ± 0.12  | 6.87 ± 0.08  | 7.06 ± 0.19  | 7.07 ± 0.11  | 8.63 ± 0.19  | 6.79 ± 0.29  | <b>7.41 ± 0.05</b> |

**ResNet50.** To demonstrate the model generality of AETTA, we report the accuracy estimation result on ResNet50 architecture on ImageNet-C (Table 6). AETTA outperformed the baselines in general, showing AETTA is applicable to diverse model architectures.

Table 6. Mean absolute error (MAE) (%) of the accuracy estimation on ResNet50 on ImageNet-C. **Bold** numbers are the lowest error. Averaged over three different random seeds for 15 types of corruption.

| Dataset              | Method           | TTA Method   |              |              |              |              |              | Avg. (↓)            |
|----------------------|------------------|--------------|--------------|--------------|--------------|--------------|--------------|---------------------|
|                      |                  | TENT [34]    | EATA [28]    | SAR [29]     | CoTTA [35]   | RoTTA [36]   | SoTTA [12]   |                     |
| Fully ImageNet-C     | SrcValid         | 46.46 ± 0.15 | 34.19 ± 0.67 | 30.35 ± 0.75 | 46.47 ± 0.17 | 12.28 ± 0.11 | 19.28 ± 0.18 | 31.50 ± 0.26        |
|                      | SoftmaxScore [7] | 23.58 ± 0.03 | 24.14 ± 0.04 | 26.22 ± 0.05 | 23.57 ± 0.04 | 24.32 ± 0.02 | 17.87 ± 0.24 | 23.28 ± 0.03        |
|                      | GDE [21]         | 68.39 ± 0.04 | 57.08 ± 0.08 | 55.81 ± 0.06 | 68.36 ± 0.04 | 58.69 ± 0.09 | 48.15 ± 0.33 | 59.41 ± 0.04        |
|                      | AdvPerturb [23]  | 12.77 ± 0.04 | 21.16 ± 0.05 | 23.66 ± 0.08 | 12.77 ± 0.05 | 16.44 ± 0.00 | 25.28 ± 0.32 | 18.68 ± 0.05        |
|                      | AETTA            | 6.14 ± 0.05  | 9.15 ± 0.03  | 8.50 ± 0.07  | 6.15 ± 0.04  | 28.28 ± 0.03 | 36.90 ± 0.36 | <b>15.85 ± 0.09</b> |
| Continual ImageNet-C | SrcValid         | 46.38 ± 0.10 | 35.83 ± 0.74 | 24.35 ± 1.86 | 46.46 ± 0.22 | 13.79 ± 0.16 | 5.12 ± 0.29  | 28.65 ± 0.46        |
|                      | SoftmaxScore [7] | 23.58 ± 0.03 | 21.34 ± 0.06 | 16.64 ± 0.25 | 23.61 ± 0.01 | 19.99 ± 0.25 | 51.60 ± 0.75 | 26.13 ± 0.12        |
|                      | GDE [21]         | 68.36 ± 0.03 | 58.41 ± 0.14 | 60.20 ± 0.24 | 68.38 ± 0.01 | 68.98 ± 0.52 | 86.08 ± 0.36 | 68.40 ± 0.09        |
|                      | AdvPerturb [23]  | 12.80 ± 0.04 | 19.82 ± 0.12 | 21.50 ± 0.14 | 12.77 ± 0.02 | 13.77 ± 0.35 | 4.79 ± 0.17  | 14.24 ± 0.07        |
|                      | AETTA            | 6.15 ± 0.05  | 10.81 ± 0.01 | 6.41 ± 0.08  | 6.00 ± 0.04  | 14.90 ± 0.30 | 4.21 ± 0.12  | <b>8.08 ± 0.04</b>  |

## C. Discussion

**Potential Societal Impact.** The computational overheads associated with test-time adaptation (TTA) could raise environmental concerns, particularly regarding carbon emissions. Our algorithm introduces  $N$  extra model inferences for accuracy estimation. Importantly, our approach of utilizing dropout inference is computationally lightweight compared to baseline methods involving model retraining [21] and adversarial backpropagation [23]. Recent advancements, such as the memory-economic TTA [20], are anticipated to tackle these challenges effectively. This implies that, despite the computational demands, the environmental impact of our approach could be mitigated by integrating emerging strategies for resource-efficient TTA implementations.

**Limitations and Future Directions.** Our research investigates the possibility of accuracy estimation for TTA with only unlabeled data. A promising direction for further improvements is the (1) optimization of the weighting constant  $b$  (or corresponding  $a$ ), which stands to fine-tune the calibration process, and (2) estimation of the variable  $C$  for more precise error estimates. Also, we presented a case study on model recovery to demonstrate the practicality of accuracy estimation. While we chose a heuristic method to reset the model for the simplicity of analysis, there exists room for improvement to be more effective. Beyond model recovery, we also envision the potential of accuracy estimation in broader applications, such as model refinement and maintenance processes, and enhancing the dynamics of human-AI interactions, which we leave as future work.

## D. Experiment Details

We conducted all experiments under three random seeds (0, 1, 2) and reported the average values with standard deviations. The experiments were performed on NVIDIA GeForce RTX 3090 and NVIDIA TITAN RTX GPUs.

### D.1. Accuracy Estimation Details

**AETTA (Ours).** We used the number of dropout inference samples  $N = 10$  and prediction disagreement weighting hyperparameter  $\alpha = 3$  for all experiments. The maximum entropy for the model  $E^{\max}$  is calculated as  $E^{\max} = \text{Ent}(\bar{\mathbf{1}}_K/K)$  where  $K$  is a number of classes and  $\bar{\mathbf{1}}_K$  is one vector with size  $K$ ; which results in 2.3, 4.6, and 6.9 for 10, 100, and 1,000 classes. We applied the Dropout module for each residual block layer in ResNet18 [17], where the dropout rate is 0.4, 0.3, and 0.2 for 10, 100, and 1,000 classes, following previous studies which apply different hyperparameters for different numbers of classes [12, 28, 35].

**SrcValid.** For SrcValid, we used labeled source-domain validation data and calculated the accuracy. We used 1,000 random samples from the validation set of the source dataset.

**SoftmaxScore.** For SoftmaxScore [7], we utilized the average softmax score for the current test batch as the estimated accuracy. We additionally applied temperature scaling [16] with temperature value  $T = 2$ , which showed the best estimation performance on CIFAR10-C, to enhance the estimation performance.

**GDE.** For generalization disagreement equality (GDE) [21], we calculated the (dis)agreement rate between predictions of the test batch over a pair of models. Unlike the setting in domain adaptation of utilizing multiple pre-trained models, we utilized the models in different adaptation stages. Specifically, we compared the two models: (1) the currently adapted model and (2) the previous model right before the adaptation. This follows the suggestion that utilizing only two models is sufficient to calculate disagreement [21].

**AdvPerturb.** Adversarial perturbation [23] estimates the source model accuracy by calculating the agreement between the domain-adapted and source models by applying adversarial perturbation on the source model side. In the TTA setting, we compared the test-time-adapted model with the source model and applied the FGSM [14] adversarial attack with attack size following the original paper ( $\epsilon = 1/255$ ).

### D.2. TTA Method Details

In this study, we followed the official implementation of TTA methods. To maintain consistency, we adopted the optimal hyperparameters reported in the corresponding papers or source code repositories. We also provide additional implementation details and the use of hyperparameters if not specified in the original paper or the source code.

**TENT.** For TENT [34], we configured the learning rate as  $LR = 0.001$  for CIFAR10-C/CIFAR100-C and  $LR = 0.00025$  for ImageNet-C, aligning with the guidelines outlined in the original paper. The implementation followed the official code.<sup>3</sup>

**EATA.** For EATA [28], we followed the original configuration of  $LR = 0.005/0.005/0.00025$  for CIFAR10-C/CIFAR100-C/ImageNet-C, entropy constant  $E_0 = 0.4 \times \ln K$ , where  $K$  represents the number of classes. Additionally, we set the cosine sample similarity threshold  $\epsilon = 0.4/0.4/0.05$ , trade-off parameter  $\beta = 1/1/2,000$ , and moving average factor  $\alpha = 0.1$ . The Fisher importance calculation involved 2,000 samples, as recommended. The implementation followed the official code.<sup>4</sup>

**SAR.** For SAR [29], we selected a batch size 64 for fair comparisons. We set a learning rate of  $LR = 0.00025$ , sharpness threshold  $\rho = 0.5$ , and entropy threshold  $E_0 = 0.4 \times \ln K$ , following the recommendations from the original paper. The top layer (layer 4 for ResNet18) was frozen, consistent with the original paper. The implementation followed the official code.<sup>5</sup>

**CoTTA.** For CoTTA [35], we set the restoration factor  $p = 0.01$ , and exponential moving average (EMA) factor  $\alpha = 0.999$ . For augmentation confidence threshold  $p_{th}$ , we followed the authors’ guidelines as  $p_{th} = 0.92$  for CIFAR10-C,  $p_{th} = 0.72$  for CIFAR100-C, and  $p_{th} = 0.1$  for ImageNet-C. The implementation followed the official code.<sup>6</sup>

**RoTTA.** For RoTTA [36], we utilized the Adam optimizer [22] with a learning rate of  $LR = 0.001$  and  $\beta = 0.9$ . We followed the original hyperparameters, including BN-statistic exponential moving average updating rate  $\alpha = 0.05$ , Teacher model’s exponential moving average updating rate  $\nu = 0.001$ , timeliness parameter  $\lambda_t = 1.0$ , and uncertainty parameter  $\lambda_u = 1.0$ . The implementation followed the original code.<sup>7</sup>

**SoTTA.** For SoTTA [12], the Adam optimizer [22] was employed, featuring a BN momentum of  $m = 0.2$  and a learning rate of  $LR = 0.001$  with a single adaptation epoch. The memory size was set to 64, with the confidence threshold  $C_0$  configured as 0.99 for CIFAR10-C (10 classes), 0.66 for CIFAR100-C (100 classes), and 0.33 for ImageNet-C (1,000 classes). The entropy-sharpness L2-norm constraint  $\rho$  was set to 0.5, aligning with the suggestion [8]. The top layer was frozen following the original paper. The implementation followed the original code.<sup>8</sup>

### D.3. Experiment Setting Details

**Datasets.** CIFAR10-C/CIFAR100-C/ImageNet-C [18] are the most widely used benchmarks for test-time adaptation (TTA) [11, 12, 28, 29, 34–36]. All datasets contain 15 corruption types, including Gaussian, Snow, Frost, Fog, Brightness, Contrast, Elastic Transformation, Pixelate, and JPEG Compression. Each corruption is applied in 5 levels of severity, where we adopt the highest severity level of 5. CIFAR10-C and CIFAR100-C consist of 50,000 train images and 10,000 test images for 10 and 100 classes. ImageNet-C consists of 1,281,167 train images and 50,000 test images for 1,000 classes.

**Pre-Training.** We employed the ResNet18 [17] as the backbone network. The model is trained for each CIFAR10-C/CIFAR100-C/ImageNet-C on the training dataset. For CIFAR10-C/CIFAR100-C, we utilized the stochastic gradient descent with a batch size of 128, a learning rate of 0.1, and a momentum of 0.9, with cosine annealing learning rate scheduling [25] for 200 epochs. For ImageNet-C, we utilized the pre-trained model from TorchVision [26].

**Test-Time Adaptation.** For the *fully* TTA, each TTA method adapts to one corruption at a time. For the *continual* TTA, each TTA method continually adapts to 15 corruptions in the predefined order of [Gaussian, Snow, Frost, Fog, Brightness, Contrast, Elastic Transformation, Pixelate, and JPEG Compression], following the previous study [35]. For all experiments, we use the batch size of 64, with memory size 64 for RoTTA [36] and SoTTA [12] for a fair comparison.

---

<sup>3</sup><https://github.com/DequanWang/tent>

<sup>4</sup><https://github.com/mr-eggplant/EATA>

<sup>5</sup><https://github.com/mr-eggplant/SAR>

<sup>6</sup><https://github.com/qinenergy/cotta>

<sup>7</sup><https://github.com/BIT-DA/RoTTA>

<sup>8</sup><https://github.com/taeckyung/sotta>

#### D.4. Model Recovery Details (Section 5)

**AETTA (Ours).** With AETTA, our reset algorithm detects two cases: (1) consecutive low accuracies and (2) sudden accuracy drops. For consecutive low accuracies, we utilize the information of estimated accuracy from each 5 batches. Regarding hard lower-bound thresholding, we employ a threshold value of 0.2. We reset both the model’s weights to those from the source model and the optimizer’s state to its initialization value.

**Episodic.** Episodic resetting was first introduced by MEMO [37], where the model resets after every batch. We reset both the model’s weights and the optimizer’s state to its value before adaptation.

**MRS.** The Model Recovery Scheme (MRS) was initially introduced by SAR [29] to recover the model from collapsing. The reset occurs when the moving average of entropy loss falls below a certain threshold. We utilized the threshold value of 0.2 introduced in the original paper. We reset both the model’s weights to those from the source model and the optimizer’s state to its initialization value.

**Stochastic.** Stochastic restoration was first introduced by CoTTA [35]. A small number of model weights are stochastically restored to the initial weights of the source model, with a certain probability specified by the restoration factor. We use the restoration factor 0.01, as introduced in the original work.

**FisherStochastic.** Fisher information based restoration was proposed by PETAL [3], based on the stochastic restoration [35]. It applies stochastic restoration based on layer importance measured by the Fisher information matrix (FIM). We use an FIM-based parameter restoration quantile value of 0.03 for CIFAR100-C, as recommended in the original paper. The parameter with an FIM value less than 0.03-quantile would be restored to the original source weight.

**DistShift.** DistShift assumes that the model knows when the distribution changes and thus acts as an oracle. Resetting occurs when the test data distribution (corruption) changes. We reset both the model’s weights to those from the source model and the optimizer’s state to its initialization value.

#### E. License of Assets

**Datasets.** CIFAR10/CIFAR100 (MIT License), CIFAR10-C/CIFAR100-C (Creative Commons Attribution 4.0 International) and ImageNet-C (Apache 2.0).

**Codes.** Torchvision for ResNet18 and ResNet50 (Apache 2.0), the official repository of TENT (MIT License), the official repository of EATA (MIT License), the official repository of SAR (BSD 3-Clause License), the official repository of CoTTA (MIT License), the official repository of RoTTA (MIT License), and the official repository of SoTTA (MIT License).

## F. Result Details

We report the detailed results per corruption in the main experiments. Table 1 in the main paper is detailed in Table 7, Table 8, and Table 9. Table 2 in the main paper is detailed in Table 10, Table 11, and Table 12. Table 3 in the main paper is detailed in Table 13.

Table 7. Mean absolute error (MAE) (%) of the accuracy estimation on fully CIFAR10-C. Averaged over three different random seeds.

| TTA Method | Acc. Estimation  | Noise |       |       | Blur  |       |       |       | Weather |       |       |       | Digital |       |       |       | Avg.(↓) |
|------------|------------------|-------|-------|-------|-------|-------|-------|-------|---------|-------|-------|-------|---------|-------|-------|-------|---------|
|            |                  | Gau.  | Shot  | Imp.  | Def.  | Gla.  | Mot.  | Zoom  | Snow    | Fro.  | Fog   | Brit. | Cont.   | Elas. | Pix.  | JPEG  |         |
| TENT [34]  | SrcValid         | 24.85 | 21.82 | 32.41 | 11.60 | 32.49 | 12.78 | 11.16 | 15.90   | 17.90 | 13.12 | 8.46  | 12.62   | 21.53 | 16.35 | 22.57 | 18.37   |
|            | SoftmaxScore [7] | 8.40  | 6.57  | 12.95 | 3.96  | 14.30 | 3.76  | 3.52  | 4.40    | 6.20  | 4.08  | 3.13  | 4.06    | 6.62  | 4.63  | 7.32  | 6.26    |
|            | GDE [21]         | 25.29 | 22.16 | 32.75 | 12.07 | 33.26 | 12.78 | 11.25 | 16.02   | 18.57 | 13.56 | 8.81  | 12.72   | 21.58 | 16.64 | 22.97 | 18.69   |
|            | AdvPerturb [23]  | 48.04 | 44.69 | 41.20 | 28.88 | 10.96 | 18.75 | 22.50 | 5.56    | 14.27 | 10.58 | 2.48  | 52.38   | 4.73  | 35.74 | 5.20  | 23.06   |
|            | AETTA            | 4.12  | 4.67  | 4.59  | 3.14  | 7.05  | 3.20  | 3.07  | 3.66    | 4.07  | 3.32  | 2.70  | 4.29    | 4.01  | 3.69  | 4.41  | 4.00    |
| EATA [28]  | SrcValid         | 18.53 | 16.06 | 24.04 | 10.55 | 23.95 | 11.72 | 10.26 | 12.81   | 12.85 | 10.27 | 7.78  | 8.88    | 19.00 | 12.62 | 16.18 | 14.37   |
|            | SoftmaxScore [7] | 4.75  | 3.85  | 9.08  | 4.14  | 8.77  | 3.92  | 4.44  | 3.50    | 3.54  | 4.02  | 4.79  | 4.22    | 4.38  | 3.58  | 4.70  | 4.78    |
|            | GDE [21]         | 22.88 | 20.42 | 30.68 | 11.07 | 30.04 | 12.58 | 10.78 | 14.99   | 14.52 | 11.48 | 8.27  | 9.32    | 21.01 | 14.85 | 21.31 | 16.95   |
|            | AdvPerturb [23]  | 50.21 | 45.60 | 44.13 | 31.34 | 16.32 | 19.30 | 22.95 | 6.43    | 17.52 | 13.62 | 2.73  | 56.00   | 4.93  | 37.56 | 5.99  | 24.97   |
|            | AETTA            | 3.86  | 4.09  | 5.56  | 3.07  | 6.88  | 3.42  | 3.07  | 3.25    | 3.48  | 3.31  | 2.73  | 2.76    | 4.45  | 3.34  | 4.72  | 3.87    |
| SAR [29]   | SrcValid         | 32.05 | 30.47 | 37.29 | 12.22 | 33.83 | 13.71 | 12.62 | 18.37   | 19.73 | 14.61 | 9.26  | 13.12   | 23.28 | 20.67 | 28.02 | 21.28   |
|            | SoftmaxScore [7] | 4.21  | 4.08  | 5.52  | 6.28  | 4.89  | 5.92  | 6.49  | 4.85    | 4.86  | 5.80  | 7.11  | 5.34    | 4.26  | 4.55  | 3.94  | 5.21    |
|            | GDE [21]         | 31.88 | 30.38 | 37.17 | 12.22 | 33.72 | 13.71 | 12.62 | 18.37   | 19.73 | 14.61 | 9.26  | 13.12   | 23.28 | 20.67 | 27.99 | 21.25   |
|            | AdvPerturb [23]  | 42.25 | 37.73 | 38.52 | 30.55 | 9.85  | 18.17 | 21.66 | 4.60    | 14.48 | 11.73 | 2.71  | 52.81   | 4.92  | 31.36 | 6.98  | 21.89   |
|            | AETTA            | 4.91  | 5.15  | 4.75  | 2.92  | 5.42  | 3.09  | 3.18  | 3.55    | 3.65  | 3.25  | 2.81  | 3.58    | 3.87  | 3.69  | 4.47  | 3.89    |
| CoTTA [35] | SrcValid         | 23.70 | 21.84 | 28.79 | 12.46 | 29.57 | 13.92 | 12.75 | 17.30   | 17.21 | 14.75 | 9.26  | 15.14   | 21.29 | 17.69 | 20.78 | 18.43   |
|            | SoftmaxScore [7] | 16.82 | 17.21 | 16.33 | 6.71  | 12.30 | 7.02  | 7.30  | 9.69    | 12.00 | 7.54  | 7.18  | 7.90    | 12.01 | 11.76 | 12.69 | 10.96   |
|            | GDE [21]         | 15.65 | 14.29 | 19.35 | 12.08 | 21.18 | 13.08 | 12.20 | 14.43   | 13.44 | 13.60 | 9.20  | 13.16   | 16.40 | 13.91 | 15.46 | 14.50   |
|            | AdvPerturb [23]  | 16.79 | 15.09 | 18.84 | 31.44 | 6.81  | 20.83 | 23.18 | 6.05    | 11.83 | 17.25 | 2.64  | 55.25   | 14.63 | 21.96 | 7.41  | 18.00   |
|            | AETTA            | 15.34 | 15.26 | 14.98 | 3.02  | 6.45  | 3.22  | 3.20  | 4.11    | 5.57  | 3.48  | 2.79  | 4.24    | 5.56  | 6.10  | 9.18  | 6.83    |
| RoTTA [36] | SrcValid         | 27.12 | 27.75 | 14.88 | 12.12 | 25.35 | 5.02  | 4.88  | 14.33   | 36.52 | 11.62 | 35.55 | 35.93   | 20.00 | 7.96  | 26.23 | 20.35   |
|            | SoftmaxScore [7] | 4.68  | 4.64  | 5.19  | 7.29  | 4.77  | 7.12  | 7.73  | 6.49    | 6.28  | 7.32  | 8.40  | 4.71    | 5.25  | 5.89  | 4.39  | 6.01    |
|            | GDE [21]         | 32.94 | 30.87 | 39.40 | 12.02 | 34.18 | 13.48 | 12.01 | 17.90   | 21.73 | 13.93 | 8.90  | 40.52   | 22.68 | 21.22 | 27.31 | 23.27   |
|            | AdvPerturb [23]  | 40.38 | 36.59 | 35.02 | 29.64 | 9.29  | 17.31 | 21.45 | 4.81    | 11.96 | 11.24 | 2.70  | 26.49   | 5.42  | 29.92 | 8.06  | 19.35   |
|            | AETTA            | 13.47 | 13.35 | 9.74  | 3.55  | 5.42  | 3.68  | 3.88  | 4.45    | 4.93  | 4.51  | 3.31  | 12.13   | 4.66  | 4.97  | 4.57  | 6.44    |
| SoTTA [12] | SrcValid         | 11.98 | 10.86 | 8.25  | 9.73  | 23.16 | 4.54  | 4.74  | 5.55    | 16.12 | 4.56  | 13.62 | 38.68   | 19.00 | 5.57  | 20.67 | 13.13   |
|            | SoftmaxScore [7] | 4.10  | 4.46  | 4.50  | 5.45  | 5.05  | 5.47  | 6.14  | 4.82    | 4.91  | 5.61  | 6.17  | 4.36    | 4.23  | 5.25  | 4.07  | 4.97    |
|            | GDE [21]         | 23.46 | 20.15 | 29.27 | 10.60 | 28.84 | 11.03 | 10.00 | 13.53   | 14.42 | 10.67 | 7.09  | 13.81   | 19.08 | 14.25 | 20.51 | 16.45   |
|            | AdvPerturb [23]  | 47.94 | 43.98 | 44.74 | 30.14 | 12.47 | 18.81 | 22.85 | 5.48    | 16.01 | 12.78 | 2.68  | 49.76   | 4.95  | 37.03 | 5.63  | 23.68   |
|            | AETTA            | 9.08  | 9.51  | 9.23  | 3.58  | 5.01  | 3.63  | 3.77  | 3.86    | 4.99  | 4.24  | 3.05  | 5.15    | 4.33  | 5.43  | 4.41  | 5.28    |



Table 8. Mean absolute error (MAE) (%) of the accuracy estimation on fully CIFAR100-C. Averaged over three different random seeds.

| TTA Method | Acc. Estimation  | Noise          |                |                | Blur           |                |                |                | Weather        |                |                |                | Digital        |                |                |                | Avg.(↓)        |
|------------|------------------|----------------|----------------|----------------|----------------|----------------|----------------|----------------|----------------|----------------|----------------|----------------|----------------|----------------|----------------|----------------|----------------|
|            |                  | Gau.           | Shot           | Imp.           | Def.           | Gla.           | Mot.           | Zoom           | Snow           | Fro.           | Fog            | Brit.          | Cont.          | Elas.          | Pix.           | JPEG           |                |
| TENT [34]  | SrcValid         | 46.38<br>±1.17 | 45.01<br>±1.16 | 51.81<br>±1.79 | 31.42<br>±0.67 | 49.43<br>±0.58 | 33.51<br>±0.64 | 31.37<br>±0.35 | 39.05<br>±0.33 | 38.89<br>±0.28 | 34.25<br>±0.38 | 28.72<br>±0.33 | 33.04<br>±0.61 | 41.81<br>±0.75 | 35.52<br>±0.51 | 44.24<br>±0.66 | 38.96<br>±0.22 |
|            | SoftmaxScore [7] | 13.70<br>±0.41 | 14.53<br>±0.58 | 11.33<br>±0.70 | 20.57<br>±0.40 | 13.53<br>±0.49 | 19.91<br>±0.60 | 21.14<br>±0.25 | 17.30<br>±0.27 | 17.10<br>±0.23 | 18.95<br>±0.23 | 21.15<br>±0.12 | 17.26<br>±0.66 | 18.07<br>±0.57 | 19.69<br>±0.13 | 15.89<br>±0.14 | 17.34<br>±0.10 |
|            | GDE [21]         | 49.21<br>±0.79 | 47.38<br>±0.87 | 54.91<br>±0.53 | 31.71<br>±0.36 | 50.52<br>±0.75 | 33.61<br>±0.70 | 31.61<br>±0.37 | 40.02<br>±0.45 | 40.32<br>±0.33 | 36.41<br>±0.33 | 28.89<br>±0.17 | 32.74<br>±0.61 | 42.20<br>±0.70 | 36.20<br>±0.11 | 45.87<br>±0.35 | 40.11<br>±0.05 |
|            | AdvPerturb [23]  | 36.92<br>±1.76 | 38.54<br>±0.24 | 35.93<br>±0.49 | 31.08<br>±0.42 | 26.47<br>±1.53 | 18.05<br>±0.82 | 24.02<br>±0.77 | 8.33<br>±0.53  | 21.92<br>±1.07 | 19.26<br>±0.03 | 4.58<br>±0.38  | 48.38<br>±0.25 | 5.43<br>±0.10  | 37.17<br>±2.42 | 6.42<br>±0.25  | 24.17<br>±0.41 |
|            | AETTA            | 6.55<br>±0.59  | 6.09<br>±0.17  | 7.60<br>±0.31  | 5.57<br>±0.18  | 10.27<br>±0.36 | 6.05<br>±0.37  | 5.60<br>±0.53  | 8.26<br>±0.09  | 7.21<br>±0.03  | 5.81<br>±0.09  | 5.54<br>±0.28  | 7.32<br>±0.56  | 6.99<br>±0.66  | 5.50<br>±0.23  | 8.96<br>±0.08  | 6.89<br>±0.15  |
| EATA [28]  | SrcValid         | 7.65<br>±0.94  | 7.33<br>±0.33  | 7.51<br>±0.42  | 15.32<br>±1.91 | 8.35<br>±0.45  | 13.56<br>±1.08 | 12.54<br>±1.32 | 9.21<br>±1.68  | 8.91<br>±0.48  | 9.31<br>±0.73  | 17.52<br>±1.75 | 15.60<br>±0.77 | 9.99<br>±1.31  | 9.80<br>±0.28  | 8.09<br>±0.44  | 10.71<br>±0.31 |
|            | SoftmaxScore [7] | 36.65<br>±1.55 | 35.32<br>±1.08 | 40.06<br>±2.16 | 15.38<br>±1.48 | 35.65<br>±2.20 | 19.64<br>±2.12 | 20.05<br>±5.94 | 27.09<br>±4.80 | 31.54<br>±4.28 | 24.67<br>±4.45 | 15.80<br>±2.67 | 25.68<br>±7.41 | 31.88<br>±2.77 | 26.64<br>±2.28 | 31.81<br>±0.85 | 27.86<br>±1.11 |
|            | GDE [21]         | 83.95<br>±1.83 | 83.36<br>±1.31 | 88.21<br>±0.66 | 55.73<br>±3.68 | 84.37<br>±1.49 | 62.93<br>±2.76 | 60.31<br>±7.35 | 73.24<br>±4.38 | 77.51<br>±4.24 | 70.26<br>±3.37 | 40.71<br>±9.58 | 62.07<br>±2.84 | 79.02<br>±2.84 | 71.39<br>±1.01 | 79.95<br>±1.07 | 71.53<br>±2.12 |
|            | AdvPerturb [23]  | 9.32<br>±0.83  | 8.30<br>±0.59  | 5.08<br>±0.16  | 16.05<br>±1.45 | 5.75<br>±0.87  | 7.72<br>±0.40  | 10.48<br>±1.96 | 4.03<br>±0.44  | 6.07<br>±1.16  | 6.79<br>±1.07  | 3.90<br>±0.18  | 21.65<br>±6.92 | 2.93<br>±0.09  | 12.38<br>±0.61 | 2.87<br>±0.07  | 8.22<br>±0.56  |
|            | AETTA            | 18.86<br>±2.19 | 19.47<br>±1.46 | 18.76<br>±5.27 | 17.54<br>±1.56 | 26.65<br>±2.14 | 21.51<br>±1.48 | 19.45<br>±2.91 | 20.39<br>±2.07 | 18.76<br>±1.79 | 19.32<br>±0.12 | 11.18<br>±1.82 | 23.44<br>±4.90 | 24.58<br>±0.69 | 20.48<br>±2.46 | 21.82<br>±5.09 | 20.15<br>±1.70 |
| SAR [29]   | SrcValid         | 53.44<br>±0.56 | 51.46<br>±0.76 | 59.19<br>±0.77 | 32.52<br>±0.17 | 53.90<br>±0.52 | 35.00<br>±0.71 | 33.63<br>±0.21 | 43.03<br>±0.48 | 43.55<br>±0.30 | 38.69<br>±0.40 | 30.12<br>±0.20 | 33.17<br>±0.40 | 43.77<br>±0.40 | 39.64<br>±0.44 | 49.16<br>±0.23 | 42.68<br>±0.21 |
|            | SoftmaxScore [7] | 20.82<br>±0.65 | 21.98<br>±0.41 | 18.42<br>±0.24 | 27.91<br>±0.39 | 20.67<br>±0.57 | 26.77<br>±0.56 | 27.81<br>±0.20 | 24.33<br>±0.51 | 24.01<br>±0.40 | 26.76<br>±0.48 | 27.92<br>±0.16 | 25.97<br>±0.20 | 25.72<br>±0.41 | 26.20<br>±0.38 | 23.11<br>±0.08 | 24.56<br>±0.25 |
|            | GDE [21]         | 53.09<br>±0.53 | 51.11<br>±0.69 | 58.81<br>±0.77 | 32.45<br>±0.21 | 53.63<br>±0.55 | 34.91<br>±0.76 | 33.60<br>±0.26 | 42.90<br>±0.57 | 43.42<br>±0.32 | 38.63<br>±0.43 | 30.05<br>±0.19 | 33.08<br>±0.44 | 43.65<br>±0.37 | 39.50<br>±0.44 | 48.87<br>±0.21 | 42.51<br>±0.23 |
|            | AdvPerturb [23]  | 35.15<br>±1.78 | 36.42<br>±1.64 | 32.87<br>±1.13 | 30.78<br>±0.58 | 23.87<br>±1.07 | 16.74<br>±0.22 | 22.52<br>±0.46 | 7.21<br>±0.46  | 21.01<br>±0.61 | 18.54<br>±0.59 | 4.30<br>±0.42  | 48.28<br>±0.16 | 5.65<br>±0.37  | 34.21<br>±2.97 | 6.09<br>±0.46  | 22.91<br>±0.60 |
|            | AETTA            | 5.75<br>±0.45  | 5.33<br>±0.29  | 6.90<br>±0.24  | 5.19<br>±0.22  | 9.56<br>±0.54  | 6.43<br>±0.32  | 5.82<br>±0.30  | 8.34<br>±0.28  | 7.15<br>±0.38  | 5.47<br>±0.18  | 5.37<br>±0.19  | 6.04<br>±0.23  | 6.57<br>±0.50  | 5.72<br>±0.33  | 8.50<br>±0.24  | 6.54<br>±0.15  |
| CoTTA [35] | SrcValid         | 53.11<br>±0.39 | 51.88<br>±0.44 | 57.18<br>±0.18 | 36.41<br>±0.61 | 53.90<br>±0.59 | 38.59<br>±0.67 | 37.33<br>±0.46 | 44.93<br>±0.62 | 44.30<br>±0.32 | 43.99<br>±0.46 | 32.17<br>±0.16 | 41.50<br>±1.22 | 45.74<br>±0.20 | 40.52<br>±0.10 | 47.13<br>±0.13 | 44.58<br>±0.30 |
|            | SoftmaxScore [7] | 34.06<br>±0.49 | 35.00<br>±0.50 | 32.31<br>±0.35 | 32.88<br>±0.53 | 32.16<br>±0.58 | 33.73<br>±0.76 | 34.70<br>±0.60 | 36.25<br>±0.96 | 36.42<br>±0.36 | 36.35<br>±0.55 | 30.59<br>±0.77 | 32.11<br>±0.49 | 36.57<br>±0.30 | 38.82<br>±0.21 | 35.60<br>±0.09 | 34.50<br>±0.35 |
|            | GDE [21]         | 36.44<br>±0.63 | 35.59<br>±0.34 | 38.06<br>±0.50 | 31.10<br>±0.04 | 38.74<br>±0.55 | 31.56<br>±0.59 | 30.66<br>±0.31 | 32.25<br>±0.84 | 31.99<br>±0.24 | 32.19<br>±0.47 | 29.77<br>±0.36 | 33.19<br>±0.08 | 33.02<br>±0.17 | 29.45<br>±0.39 | 34.16<br>±0.50 | 33.21<br>±0.24 |
|            | AdvPerturb [23]  | 26.80<br>±0.88 | 26.32<br>±0.95 | 26.90<br>±0.45 | 32.56<br>±0.56 | 12.67<br>±0.28 | 24.33<br>±0.97 | 27.17<br>±0.14 | 5.68<br>±0.18  | 11.58<br>±0.31 | 30.58<br>±0.42 | 5.21<br>±0.30  | 47.59<br>±0.76 | 10.03<br>±0.60 | 14.24<br>±1.60 | 6.28<br>±0.19  | 20.53<br>±0.14 |
|            | AETTA            | 9.24<br>±0.38  | 9.97<br>±0.55  | 8.79<br>±0.53  | 5.03<br>±0.20  | 4.83<br>±0.22  | 4.73<br>±0.21  | 4.92<br>±0.11  | 4.66<br>±0.11  | 4.76<br>±0.43  | 4.41<br>±0.16  | 5.04<br>±0.36  | 5.68<br>±0.24  | 4.78<br>±0.22  | 6.27<br>±0.28  | 7.65<br>±0.15  | 6.05<br>±0.12  |
| RoTTA [36] | SrcValid         | 28.06<br>±2.60 | 29.10<br>±2.49 | 16.22<br>±0.43 | 34.38<br>±1.94 | 10.57<br>±1.13 | 7.34<br>±0.25  | 17.58<br>±2.21 | 14.31<br>±1.55 | 30.17<br>±1.28 | 15.75<br>±2.45 | 30.84<br>±2.27 | 28.00<br>±1.54 | 31.30<br>±1.65 | 15.53<br>±1.36 | 43.38<br>±1.76 | 23.50<br>±0.51 |
|            | SoftmaxScore [7] | 18.70<br>±0.62 | 19.63<br>±0.63 | 17.09<br>±0.46 | 29.83<br>±0.32 | 21.67<br>±0.49 | 28.86<br>±0.09 | 30.26<br>±0.35 | 25.59<br>±0.36 | 21.84<br>±0.54 | 28.33<br>±0.32 | 29.95<br>±0.16 | 13.55<br>±0.61 | 27.63<br>±0.23 | 26.73<br>±0.37 | 23.09<br>±0.49 | 24.18<br>±0.19 |
|            | GDE [21]         | 59.99<br>±1.07 | 59.43<br>±1.11 | 63.72<br>±0.99 | 33.71<br>±0.18 | 56.11<br>±0.24 | 36.10<br>±0.55 | 34.68<br>±0.67 | 46.27<br>±0.67 | 52.01<br>±0.59 | 41.07<br>±0.62 | 31.91<br>±0.62 | 62.02<br>±0.22 | 45.38<br>±0.57 | 44.14<br>±1.05 | 53.79<br>±0.67 | 48.02<br>±0.56 |
|            | AdvPerturb [23]  | 25.47<br>±1.49 | 26.56<br>±1.30 | 25.08<br>±0.90 | 28.92<br>±0.25 | 19.97<br>±0.92 | 15.41<br>±0.66 | 21.68<br>±0.69 | 6.37<br>±0.19  | 13.92<br>±0.74 | 15.02<br>±0.93 | 4.50<br>±0.35  | 20.75<br>±1.25 | 6.84<br>±0.53  | 28.80<br>±3.46 | 8.34<br>±0.62  | 17.84<br>±0.65 |
|            | AETTA            | 6.37<br>±1.21  | 6.88<br>±0.64  | 4.81<br>±0.43  | 4.74<br>±0.23  | 6.28<br>±0.34  | 5.29<br>±0.11  | 5.18<br>±0.42  | 7.22<br>±0.43  | 7.58<br>±1.46  | 4.74<br>±0.26  | 4.79<br>±0.48  | 21.01<br>±3.35 | 5.53<br>±0.49  | 5.28<br>±0.56  | 7.43<br>±1.21  | 6.88<br>±0.10  |
| SoTTA [12] | SrcValid         | 13.43<br>±2.25 | 12.55<br>±1.41 | 8.28<br>±1.68  | 37.61<br>±3.05 | 12.41<br>±3.74 | 6.47<br>±0.88  | 12.99<br>±1.60 | 16.44<br>±1.42 | 13.05<br>±1.58 | 7.58<br>±0.80  | 10.12<br>±1.70 | 51.02<br>±4.34 | 35.45<br>±0.57 | 11.12<br>±4.35 | 41.55<br>±0.87 | 19.34<br>±0.63 |
|            | SoftmaxScore [7] | 21.66<br>±0.49 | 22.18<br>±0.45 | 19.31<br>±0.05 | 25.96<br>±0.20 | 21.08<br>±0.62 | 25.26<br>±0.47 | 26.54<br>±0.43 | 24.57<br>±0.52 | 24.12<br>±0.19 | 25.49<br>±0.26 | 26.25<br>±0.47 | 23.62<br>±0.52 | 25.30<br>±0.45 | 25.17<br>±0.29 | 23.23<br>±0.39 | 23.98<br>±0.21 |
|            | GDE [21]         | 41.62<br>±0.27 | 40.60<br>±0.39 | 48.16<br>±0.43 | 26.49<br>±0.24 | 44.28<br>±0.48 | 28.68<br>±0.42 | 26.67<br>±0.34 | 33.51<br>±0.51 | 34.05<br>±0.18 | 30.44<br>±0.51 | 24.30<br>±0.32 | 27.73<br>±0.69 | 36.20<br>±0.21 | 31.28<br>±0.44 | 39.52<br>±0.24 | 34.24<br>±0.12 |
|            | AdvPerturb [23]  | 41.39<br>±1.33 | 41.35<br>±1.19 | 38.06<br>±0.94 | 32.19<br>±0.31 | 27.92<br>±1.51 | 18.64<br>±0.14 | 24.83<br>±0.76 | 10.19<br>±0.29 | 24.05<br>±0.89 | 21.34<br>±0.74 | 4.84<br>±0.51  | 48.66<br>±0.26 | 6.74<br>±0.18  | 38.48<br>±1.95 | 7.88<br>±0.29  | 25.77<br>±0.47 |
|            | AETTA            | 8.11<br>±0.91  | 7.95<br>±0.39  | 6.35<br>±0.55  | 4.67<br>±0.32  | 5.03<br>±0.26  | 4.28<br>±0.18  | 4.50<br>±0.28  | 4.68<br>±0.21  | 4.73<br>±0.42  | 5.00<br>±0.37  | 4.18<br>±0.04  | 5.30<br>±0.20  | 4.58<br>±0.07  | 4.94<br>±0.48  | 5.02<br>±0.19  | 5.29<br>±0.18  |

Table 9. Mean absolute error (MAE) (%) of the accuracy estimation on fully ImageNet-C. Averaged over three different random seeds.

| TTA Method | Acc. Estimation  | Noise           |                 |                 | Blur            |                 |                 |                 | Weather         |                 |                 |                 | Digital         |                 |                 |                 | Avg.(↓)         |
|------------|------------------|-----------------|-----------------|-----------------|-----------------|-----------------|-----------------|-----------------|-----------------|-----------------|-----------------|-----------------|-----------------|-----------------|-----------------|-----------------|-----------------|
|            |                  | Gau.            | Shot            | Imp.            | Def.            | Gla.            | Mot.            | Zoom            | Snow            | Fro.            | Fog             | Brit.           | Cont.           | Elas.           | Pix.            | JPEG            |                 |
| TENT [34]  | SrcValid         | 53.54<br>± 1.08 | 52.12<br>± 1.12 | 53.28<br>± 0.95 | 54.72<br>± 0.95 | 53.66<br>± 1.07 | 42.96<br>± 0.92 | 32.78<br>± 0.83 | 37.25<br>± 0.96 | 38.77<br>± 0.97 | 25.06<br>± 0.94 | 10.47<br>± 0.67 | 53.56<br>± 0.77 | 27.86<br>± 0.85 | 22.35<br>± 0.70 | 28.55<br>± 0.71 | 39.13<br>± 0.89 |
|            | SoftmaxScore [7] | 11.11<br>± 0.14 | 11.97<br>± 0.06 | 11.35<br>± 0.03 | 9.82<br>± 0.09  | 10.59<br>± 0.07 | 19.16<br>± 0.09 | 26.76<br>± 0.09 | 22.44<br>± 0.05 | 21.08<br>± 0.06 | 31.41<br>± 0.05 | 34.87<br>± 0.01 | 9.52<br>± 0.04  | 28.83<br>± 0.05 | 32.26<br>± 0.14 | 28.88<br>± 0.14 | 20.67<br>± 0.01 |
|            | GDE [21]         | 85.03<br>± 0.14 | 83.75<br>± 0.06 | 84.81<br>± 0.04 | 85.74<br>± 0.09 | 84.87<br>± 0.08 | 74.26<br>± 0.10 | 64.29<br>± 0.08 | 68.95<br>± 0.06 | 70.47<br>± 0.07 | 56.71<br>± 0.02 | 41.78<br>± 0.02 | 84.43<br>± 0.09 | 59.48<br>± 0.07 | 53.93<br>± 0.12 | 60.29<br>± 0.14 | 70.58<br>± 0.01 |
|            | AdvPerturb [23]  | 13.38<br>± 0.12 | 14.08<br>± 0.05 | 13.44<br>± 0.04 | 4.43<br>± 0.15  | 5.21<br>± 0.14  | 11.48<br>± 0.05 | 11.47<br>± 0.13 | 17.17<br>± 0.13 | 8.67<br>± 0.10  | 26.80<br>± 0.03 | 6.56<br>± 0.16  | 11.99<br>± 0.03 | 17.97<br>± 0.03 | 19.11<br>± 0.14 | 6.69<br>± 0.19  | 12.56<br>± 0.03 |
|            | AETTA            | 4.88<br>± 0.10  | 4.27<br>± 0.02  | 4.93<br>± 0.09  | 7.23<br>± 0.11  | 5.03<br>± 0.15  | 4.53<br>± 0.09  | 4.72<br>± 0.12  | 4.35<br>± 0.13  | 4.37<br>± 0.11  | 9.50<br>± 0.12  | 8.88<br>± 0.05  | 6.24<br>± 0.02  | 7.34<br>± 0.06  | 8.95<br>± 0.21  | 6.82<br>± 0.17  | 6.14<br>± 0.03  |
| EATA [28]  | SrcValid         | 50.34<br>± 1.01 | 48.89<br>± 0.88 | 49.88<br>± 0.76 | 52.47<br>± 0.59 | 51.11<br>± 0.57 | 40.01<br>± 0.83 | 28.80<br>± 0.84 | 32.41<br>± 0.71 | 35.23<br>± 0.95 | 21.78<br>± 0.93 | 8.88<br>± 0.53  | 51.16<br>± 0.97 | 23.11<br>± 1.18 | 19.03<br>± 0.72 | 25.30<br>± 0.92 | 35.89<br>± 0.79 |
|            | SoftmaxScore [7] | 12.31<br>± 0.08 | 13.18<br>± 0.15 | 12.71<br>± 0.04 | 10.26<br>± 0.14 | 10.97<br>± 0.05 | 19.72<br>± 0.03 | 27.54<br>± 0.10 | 23.79<br>± 0.12 | 21.46<br>± 0.08 | 30.90<br>± 0.11 | 32.96<br>± 0.08 | 10.51<br>± 0.08 | 29.11<br>± 0.07 | 31.61<br>± 0.08 | 28.90<br>± 0.04 | 21.06<br>± 0.03 |
|            | GDE [21]         | 81.21<br>± 0.16 | 79.99<br>± 0.27 | 80.82<br>± 0.03 | 77.04<br>± 0.50 | 77.95<br>± 0.07 | 70.22<br>± 0.13 | 60.30<br>± 0.02 | 64.37<br>± 0.15 | 67.25<br>± 0.16 | 53.43<br>± 0.10 | 40.26<br>± 0.01 | 76.64<br>± 0.03 | 55.33<br>± 0.09 | 50.67<br>± 0.07 | 57.02<br>± 0.03 | 66.17<br>± 0.07 |
|            | AdvPerturb [23]  | 15.44<br>± 0.07 | 16.26<br>± 0.19 | 15.70<br>± 0.07 | 4.89<br>± 0.07  | 6.05<br>± 0.14  | 13.36<br>± 0.11 | 14.92<br>± 0.09 | 20.93<br>± 0.14 | 10.72<br>± 0.22 | 29.38<br>± 0.13 | 5.97<br>± 0.17  | 13.31<br>± 0.14 | 22.32<br>± 0.09 | 21.23<br>± 0.19 | 7.34<br>± 0.14  | 14.52<br>± 0.01 |
|            | AETTA            | 5.28<br>± 0.12  | 4.72<br>± 0.05  | 5.28<br>± 0.07  | 7.45<br>± 0.09  | 5.12<br>± 0.10  | 4.37<br>± 0.07  | 5.23<br>± 0.18  | 4.60<br>± 0.13  | 4.73<br>± 0.13  | 10.46<br>± 0.12 | 9.22<br>± 0.09  | 5.38<br>± 0.09  | 8.25<br>± 0.16  | 9.47<br>± 0.10  | 7.68<br>± 0.05  | 6.48<br>± 0.02  |
| SAR [29]   | SrcValid         | 39.53<br>± 1.22 | 37.69<br>± 1.46 | 39.79<br>± 1.36 | 43.89<br>± 1.00 | 43.75<br>± 0.82 | 33.12<br>± 0.77 | 25.52<br>± 1.06 | 27.90<br>± 0.86 | 31.43<br>± 1.03 | 17.14<br>± 0.46 | 9.03<br>± 0.71  | 40.82<br>± 0.33 | 19.89<br>± 1.25 | 16.74<br>± 0.89 | 20.27<br>± 1.14 | 29.77<br>± 0.94 |
|            | SoftmaxScore [7] | 18.07<br>± 0.26 | 19.20<br>± 0.20 | 18.08<br>± 0.21 | 14.90<br>± 0.25 | 15.23<br>± 0.29 | 24.02<br>± 0.06 | 29.50<br>± 0.06 | 26.57<br>± 0.09 | 23.87<br>± 0.16 | 33.16<br>± 0.11 | 34.57<br>± 0.09 | 12.88<br>± 1.75 | 31.62<br>± 0.09 | 33.20<br>± 0.20 | 31.47<br>± 0.02 | 24.42<br>± 0.08 |
|            | GDE [21]         | 75.10<br>± 0.28 | 73.20<br>± 0.21 | 75.19<br>± 0.25 | 77.65<br>± 0.21 | 77.44<br>± 0.28 | 66.24<br>± 0.07 | 58.62<br>± 0.07 | 61.48<br>± 0.10 | 65.23<br>± 0.16 | 50.56<br>± 0.07 | 40.51<br>± 0.12 | 74.62<br>± 0.99 | 53.29<br>± 0.08 | 49.16<br>± 0.20 | 53.97<br>± 0.02 | 63.48<br>± 0.03 |
|            | AdvPerturb [23]  | 22.95<br>± 0.27 | 24.15<br>± 0.14 | 22.86<br>± 0.25 | 7.84<br>± 0.11  | 10.46<br>± 0.36 | 18.99<br>± 0.17 | 17.74<br>± 0.13 | 24.62<br>± 0.12 | 13.19<br>± 0.07 | 32.89<br>± 0.05 | 6.06<br>± 0.06  | 21.28<br>± 0.94 | 25.45<br>± 0.13 | 23.36<br>± 0.15 | 9.55<br>± 0.11  | 18.76<br>± 0.06 |
|            | AETTA            | 5.38<br>± 0.27  | 5.24<br>± 0.16  | 5.11<br>± 0.15  | 8.06<br>± 0.04  | 6.19<br>± 0.27  | 4.53<br>± 0.08  | 5.17<br>± 0.14  | 4.97<br>± 0.11  | 4.71<br>± 0.04  | 9.73<br>± 0.16  | 8.68<br>± 0.10  | 5.39<br>± 0.33  | 7.76<br>± 0.17  | 8.66<br>± 0.19  | 6.89<br>± 0.03  | 6.43<br>± 0.09  |
| CoTTA [35] | SrcValid         | 55.20<br>± 0.50 | 54.09<br>± 0.55 | 54.87<br>± 0.49 | 56.70<br>± 0.86 | 55.43<br>± 0.45 | 45.10<br>± 0.55 | 34.91<br>± 0.54 | 39.13<br>± 0.55 | 40.12<br>± 0.54 | 27.92<br>± 0.56 | 10.68<br>± 0.44 | 56.19<br>± 0.65 | 29.77<br>± 0.49 | 24.40<br>± 0.41 | 31.80<br>± 0.56 | 41.09<br>± 0.53 |
|            | SoftmaxScore [7] | 9.93<br>± 0.07  | 10.66<br>± 0.11 | 10.24<br>± 0.03 | 8.36<br>± 0.10  | 9.36<br>± 0.05  | 17.69<br>± 0.14 | 25.68<br>± 0.03 | 21.47<br>± 0.07 | 20.57<br>± 0.05 | 30.40<br>± 0.06 | 35.07<br>± 0.08 | 7.79<br>± 0.13  | 28.04<br>± 0.03 | 31.69<br>± 0.11 | 27.39<br>± 0.08 | 19.62<br>± 0.02 |
|            | GDE [21]         | 86.85<br>± 0.06 | 85.76<br>± 0.13 | 86.52<br>± 0.02 | 88.18<br>± 0.12 | 87.04<br>± 0.05 | 76.83<br>± 0.14 | 66.63<br>± 0.03 | 70.86<br>± 0.07 | 71.81<br>± 0.06 | 59.64<br>± 0.06 | 42.23<br>± 0.09 | 87.87<br>± 0.13 | 61.50<br>± 0.03 | 56.13<br>± 0.11 | 63.53<br>± 0.08 | 72.76<br>± 0.02 |
|            | AdvPerturb [23]  | 11.73<br>± 0.07 | 12.19<br>± 0.09 | 11.84<br>± 0.03 | 3.81<br>± 0.06  | 4.33<br>± 0.03  | 9.70<br>± 0.09  | 9.46<br>± 0.06  | 15.50<br>± 0.13 | 7.86<br>± 0.13  | 24.07<br>± 0.09 | 6.72<br>± 0.20  | 9.11<br>± 0.13  | 15.96<br>± 0.09 | 17.56<br>± 0.16 | 5.96<br>± 0.34  | 11.05<br>± 0.02 |
|            | AETTA            | 4.76<br>± 0.07  | 4.00<br>± 0.04  | 4.79<br>± 0.07  | 7.69<br>± 0.18  | 5.04<br>± 0.06  | 4.63<br>± 0.08  | 4.49<br>± 0.15  | 4.39<br>± 0.08  | 4.25<br>± 0.10  | 8.97<br>± 0.12  | 8.81<br>± 0.09  | 6.70<br>± 0.18  | 7.00<br>± 0.02  | 8.44<br>± 0.19  | 6.27<br>± 0.19  | 6.02<br>± 0.03  |
| RoTTA [36] | SrcValid         | 15.32<br>± 0.10 | 13.73<br>± 0.68 | 15.71<br>± 0.14 | 4.79<br>± 0.54  | 17.18<br>± 1.34 | 5.81<br>± 0.55  | 9.04<br>± 1.50  | 8.44<br>± 0.80  | 5.54<br>± 0.33  | 8.84<br>± 1.21  | 10.68<br>± 0.77 | 14.01<br>± 0.55 | 7.27<br>± 0.34  | 5.59<br>± 0.27  | 12.32<br>± 0.91 | 10.28<br>± 0.28 |
|            | SoftmaxScore [7] | 11.98<br>± 0.07 | 12.84<br>± 0.28 | 12.31<br>± 0.13 | 9.96<br>± 0.18  | 10.93<br>± 0.12 | 19.51<br>± 0.09 | 27.15<br>± 0.18 | 23.28<br>± 0.02 | 20.61<br>± 0.11 | 31.75<br>± 0.10 | 33.58<br>± 0.05 | 11.05<br>± 0.14 | 29.18<br>± 0.04 | 32.08<br>± 0.09 | 29.22<br>± 0.10 | 21.03<br>± 0.04 |
|            | GDE [21]         | 80.31<br>± 0.05 | 79.07<br>± 0.33 | 80.18<br>± 0.21 | 82.25<br>± 0.26 | 81.56<br>± 0.12 | 70.30<br>± 0.10 | 60.45<br>± 0.17 | 64.30<br>± 0.07 | 67.01<br>± 0.25 | 52.64<br>± 0.18 | 38.45<br>± 0.03 | 77.50<br>± 0.21 | 55.15<br>± 0.07 | 50.24<br>± 0.01 | 56.48<br>± 0.20 | 66.39<br>± 0.04 |
|            | AdvPerturb [23]  | 13.96<br>± 0.07 | 14.55<br>± 0.30 | 14.24<br>± 0.13 | 4.68<br>± 0.09  | 5.18<br>± 0.05  | 11.83<br>± 0.05 | 12.11<br>± 0.12 | 17.54<br>± 0.06 | 7.91<br>± 0.12  | 27.54<br>± 0.11 | 6.71<br>± 0.08  | 12.27<br>± 0.11 | 18.72<br>± 0.11 | 19.66<br>± 0.02 | 7.09<br>± 0.19  | 12.93<br>± 0.04 |
|            | AETTA            | 14.33<br>± 0.14 | 14.97<br>± 0.22 | 14.49<br>± 0.10 | 8.62<br>± 0.48  | 7.53<br>± 0.33  | 14.33<br>± 0.27 | 13.02<br>± 0.16 | 11.06<br>± 0.16 | 12.36<br>± 0.13 | 17.18<br>± 0.13 | 16.82<br>± 0.13 | 8.27<br>± 0.27  | 15.24<br>± 0.05 | 32.03<br>± 0.07 | 22.07<br>± 0.11 | 14.82<br>± 0.01 |
| SoTTA [12] | SrcValid         | 28.39<br>± 0.39 | 25.90<br>± 0.41 | 28.46<br>± 0.79 | 9.76<br>± 2.10  | 7.02<br>± 0.68  | 21.34<br>± 2.88 | 12.78<br>± 1.76 | 18.59<br>± 0.86 | 6.08<br>± 0.71  | 18.38<br>± 0.76 | 12.63<br>± 0.92 | 22.00<br>± 0.98 | 13.36<br>± 1.19 | 9.43<br>± 0.81  | 5.84<br>± 0.67  | 16.00<br>± 0.33 |
|            | SoftmaxScore [7] | 19.01<br>± 0.14 | 20.58<br>± 0.17 | 19.52<br>± 0.27 | 16.57<br>± 0.42 | 17.93<br>± 0.07 | 24.41<br>± 0.09 | 27.95<br>± 0.15 | 26.76<br>± 0.28 | 23.75<br>± 0.09 | 30.23<br>± 0.10 | 30.71<br>± 0.14 | 6.66<br>± 0.36  | 30.04<br>± 0.14 | 30.52<br>± 0.09 | 29.35<br>± 0.21 | 23.60<br>± 0.07 |
|            | GDE [21]         | 62.46<br>± 0.16 | 60.09<br>± 0.20 | 62.04<br>± 0.18 | 64.31<br>± 0.25 | 63.47<br>± 0.16 | 53.92<br>± 0.34 | 48.60<br>± 0.35 | 50.02<br>± 0.29 | 54.63<br>± 0.18 | 42.15<br>± 0.15 | 35.24<br>± 0.17 | 64.78<br>± 0.07 | 43.55<br>± 0.18 | 40.82<br>± 0.15 | 45.04<br>± 0.07 | 52.74<br>± 0.02 |
|            | AdvPerturb [23]  | 27.73<br>± 0.10 | 29.55<br>± 0.21 | 28.38<br>± 0.31 | 12.10<br>± 0.29 | 17.45<br>± 0.17 | 24.33<br>± 0.18 | 23.11<br>± 0.23 | 30.31<br>± 0.26 | 17.63<br>± 0.08 | 36.11<br>± 0.08 | 5.52<br>± 0.12  | 21.22<br>± 0.32 | 31.03<br>± 0.08 | 26.34<br>± 0.10 | 12.61<br>± 0.06 | 22.90<br>± 0.02 |
|            | AETTA            | 17.92<br>± 0.25 | 18.73<br>± 0.95 | 16.32<br>± 2.09 | 14.69<br>± 1.33 | 7.64<br>± 0.29  | 18.94<br>± 0.59 | 17.21<br>± 0.54 | 16.92<br>± 0.51 | 14.49<br>± 0.37 | 20.84<br>± 0.02 | 18.54<br>± 0.44 | 12.70<br>± 1.06 | 20.46<br>± 0.39 | 25.44<br>± 0.42 | 20.13<br>± 0.17 | 17.40<br>± 0.26 |

Table 10. Mean absolute error (MAE) (%) of the accuracy estimation on continual CIFAR10-C. Averaged over three different random seeds.

| TTA Method | Acc. Estimation  | $t \rightarrow$ |                |                |                |                 |                 |                 |                 |                 |                 |                 |                 |                 |                 |                 | Avg.(↓)         |
|------------|------------------|-----------------|----------------|----------------|----------------|-----------------|-----------------|-----------------|-----------------|-----------------|-----------------|-----------------|-----------------|-----------------|-----------------|-----------------|-----------------|
|            |                  | Gau.            | Shot           | Imp.           | Def.           | Gla.            | Mot.            | Zoom            | Snow            | Fro.            | Fog             | Brit.           | Cont.           | Elas.           | Pix.            | JPEG            |                 |
| TENT [34]  | SrcValid         | 24.85<br>±0.83  | 17.83<br>±1.52 | 22.28<br>±0.17 | 8.89<br>±1.17  | 19.20<br>±3.28  | 8.62<br>±3.45   | 7.16<br>±2.71   | 9.00<br>±3.73   | 8.13<br>±2.54   | 7.34<br>±2.32   | 4.44<br>±0.57   | 6.28<br>±1.89   | 7.70<br>±3.52   | 5.22<br>±1.67   | 5.68<br>±2.27   | 10.84<br>±1.83  |
|            | SoftmaxScore [7] | 8.40<br>±0.10   | 12.84<br>±2.07 | 24.30<br>±4.53 | 20.45<br>±7.09 | 38.03<br>±11.59 | 37.45<br>±14.78 | 37.21<br>±16.96 | 42.53<br>±19.10 | 45.88<br>±18.10 | 49.95<br>±15.87 | 49.10<br>±14.58 | 56.89<br>±12.63 | 62.16<br>±13.50 | 63.30<br>±12.88 | 68.01<br>±12.02 | 41.10<br>±11.66 |
|            | GDE [21]         | 25.29<br>±0.67  | 22.33<br>±1.77 | 33.67<br>±4.42 | 25.64<br>±6.92 | 45.16<br>±10.64 | 41.70<br>±13.71 | 40.88<br>±16.32 | 46.23<br>±18.18 | 49.25<br>±16.91 | 52.99<br>±14.83 | 51.55<br>±13.76 | 59.15<br>±12.01 | 65.02<br>±12.36 | 65.40<br>±11.94 | 70.16<br>±11.23 | 46.29<br>±10.93 |
|            | AdvPerturb [23]  | 48.04<br>±2.26  | 44.46<br>±5.59 | 44.82<br>±7.11 | 15.98<br>±7.94 | 10.29<br>±2.90  | 6.10<br>±0.85   | 7.51<br>±4.79   | 4.17<br>±0.50   | 6.54<br>±2.69   | 9.16<br>±3.21   | 2.32<br>±0.35   | 17.84<br>±10.01 | 3.97<br>±0.58   | 8.40<br>±3.06   | 3.74<br>±0.23   | 15.56<br>±1.53  |
|            | AETTA            | 4.12<br>±0.45   | 4.02<br>±0.26  | 4.63<br>±0.31  | 8.37<br>±3.30  | 6.92<br>±0.72   | 11.18<br>±4.48  | 10.40<br>±6.13  | 9.48<br>±2.58   | 12.23<br>±5.64  | 11.40<br>±5.47  | 13.30<br>±0.62  | 14.01<br>±5.38  | 14.17<br>±6.47  | 13.96<br>±4.59  | 12.58<br>±5.01  | 10.05<br>±1.69  |
| EATA [28]  | SrcValid         | 18.53<br>±0.43  | 11.25<br>±0.30 | 17.43<br>±1.46 | 7.76<br>±0.72  | 20.95<br>±1.86  | 8.86<br>±0.99   | 7.02<br>±0.97   | 10.91<br>±1.06  | 9.68<br>±1.26   | 7.36<br>±1.45   | 4.34<br>±0.70   | 6.45<br>±0.16   | 16.05<br>±1.85  | 8.15<br>±0.85   | 11.16<br>±2.45  | 11.06<br>±0.11  |
|            | SoftmaxScore [7] | 4.75<br>±0.62   | 6.20<br>±1.19  | 15.17<br>±1.79 | 10.01<br>±3.73 | 21.53<br>±3.27  | 18.50<br>±7.97  | 15.43<br>±6.98  | 16.81<br>±4.13  | 17.71<br>±7.04  | 15.33<br>±7.57  | 12.30<br>±5.54  | 14.49<br>±4.63  | 21.08<br>±6.59  | 18.07<br>±6.32  | 23.67<br>±6.32  | 15.40<br>±4.73  |
|            | GDE [21]         | 22.88<br>±0.72  | 20.96<br>±1.47 | 31.37<br>±2.07 | 21.28<br>±4.63 | 36.43<br>±3.32  | 29.58<br>±8.64  | 25.03<br>±7.81  | 26.76<br>±4.68  | 27.17<br>±7.62  | 23.91<br>±8.61  | 19.29<br>±6.98  | 21.44<br>±6.17  | 31.55<br>±4.68  | 26.22<br>±6.77  | 32.68<br>±5.87  | 26.44<br>±5.16  |
|            | AdvPerturb [23]  | 50.21<br>±4.36  | 45.51<br>±5.20 | 42.95<br>±5.29 | 23.78<br>±5.30 | 12.43<br>±0.75  | 11.88<br>±4.12  | 16.14<br>±4.75  | 4.38<br>±0.46   | 12.59<br>±3.26  | 9.28<br>±2.72   | 2.47<br>±0.07   | 44.14<br>±6.38  | 4.71<br>±0.28   | 28.64<br>±6.81  | 4.84<br>±0.67   | 20.93<br>±2.83  |
|            | AETTA            | 3.86<br>±0.28   | 3.98<br>±0.12  | 5.96<br>±1.90  | 5.97<br>±2.48  | 9.89<br>±1.84   | 10.47<br>±6.25  | 8.03<br>±5.24   | 7.47<br>±3.19   | 7.79<br>±5.72   | 7.02<br>±4.80   | 5.59<br>±3.33   | 6.80<br>±3.37   | 6.69<br>±3.13   | 7.13<br>±4.33   | 10.22<br>±4.52  | 7.13<br>±3.33   |
| SAR [29]   | SrcValid         | 32.05<br>±1.03  | 30.47<br>±0.76 | 37.42<br>±0.42 | 12.20<br>±0.20 | 33.88<br>±0.52  | 13.69<br>±0.12  | 12.62<br>±0.36  | 18.37<br>±0.36  | 19.73<br>±0.57  | 14.61<br>±0.24  | 9.26<br>±0.24   | 13.12<br>±0.43  | 23.28<br>±0.20  | 20.67<br>±0.02  | 28.03<br>±0.53  | 21.29<br>±0.26  |
|            | SoftmaxScore [7] | 4.21<br>±0.33   | 4.04<br>±0.20  | 5.54<br>±0.53  | 6.28<br>±0.32  | 4.91<br>±0.14   | 5.93<br>±0.25   | 6.49<br>±0.52   | 4.85<br>±0.27   | 4.86<br>±0.29   | 5.80<br>±0.59   | 7.11<br>±0.48   | 5.34<br>±0.30   | 4.26<br>±0.24   | 4.55<br>±0.09   | 3.94<br>±0.11   | 5.21<br>±0.22   |
|            | GDE [21]         | 31.88<br>±1.08  | 30.35<br>±0.80 | 37.25<br>±0.49 | 12.19<br>±0.20 | 33.80<br>±0.52  | 13.68<br>±0.13  | 12.62<br>±0.36  | 18.37<br>±0.36  | 19.73<br>±0.52  | 14.61<br>±0.57  | 9.26<br>±0.24   | 13.12<br>±0.43  | 23.28<br>±0.20  | 20.67<br>±0.02  | 28.01<br>±0.52  | 21.25<br>±0.27  |
|            | AdvPerturb [23]  | 42.25<br>±2.34  | 37.75<br>±2.91 | 38.40<br>±4.24 | 30.55<br>±3.11 | 9.77<br>±1.93   | 18.20<br>±1.52  | 21.66<br>±2.37  | 4.60<br>±0.60   | 14.48<br>±2.98  | 11.73<br>±0.52  | 2.71<br>±0.14   | 52.81<br>±2.08  | 4.92<br>±0.04   | 31.36<br>±0.89  | 6.98<br>±0.45   | 21.88<br>±0.93  |
|            | AETTA            | 4.91<br>±0.84   | 5.14<br>±0.85  | 4.77<br>±0.15  | 2.91<br>±0.14  | 5.45<br>±0.50   | 3.08<br>±0.06   | 3.18<br>±0.21   | 3.55<br>±0.37   | 3.65<br>±0.17   | 3.25<br>±0.34   | 2.81<br>±0.06   | 3.58<br>±0.61   | 3.87<br>±0.15   | 3.69<br>±0.43   | 4.48<br>±0.23   | 3.89<br>±0.06   |
| CoTTA [35] | SrcValid         | 23.70<br>±0.75  | 21.71<br>±0.16 | 28.09<br>±0.28 | 12.26<br>±0.05 | 28.88<br>±0.55  | 13.78<br>±0.09  | 12.46<br>±0.35  | 17.09<br>±0.59  | 17.19<br>±0.48  | 15.34<br>±0.36  | 9.18<br>±0.14   | 16.33<br>±0.42  | 21.34<br>±0.68  | 16.88<br>±0.25  | 20.29<br>±0.38  | 18.30<br>±0.25  |
|            | SoftmaxScore [7] | 16.82<br>±0.51  | 16.82<br>±0.61 | 16.38<br>±0.27 | 8.79<br>±0.51  | 13.43<br>±0.32  | 9.90<br>±0.53   | 10.29<br>±0.48  | 12.04<br>±0.84  | 14.12<br>±0.52  | 10.76<br>±0.50  | 10.49<br>±0.65  | 9.82<br>±0.61   | 13.90<br>±0.44  | 15.08<br>±0.74  | 15.73<br>±0.81  | 12.96<br>±0.37  |
|            | GDE [21]         | 15.65<br>±0.77  | 14.46<br>±0.13 | 19.48<br>±0.59 | 11.93<br>±0.06 | 21.35<br>±0.41  | 13.05<br>±0.12  | 12.00<br>±0.21  | 14.71<br>±0.35  | 13.73<br>±0.30  | 14.20<br>±0.32  | 9.14<br>±0.13   | 14.62<br>±0.20  | 16.83<br>±0.33  | 13.66<br>±0.33  | 15.56<br>±0.37  | 14.69<br>±0.15  |
|            | AdvPerturb [23]  | 16.79<br>±0.32  | 15.00<br>±0.78 | 19.37<br>±3.92 | 31.13<br>±3.19 | 7.05<br>±0.41   | 20.30<br>±2.25  | 23.01<br>±2.44  | 5.86<br>±0.42   | 11.50<br>±1.57  | 16.32<br>±1.37  | 2.55<br>±0.09   | 53.39<br>±1.32  | 13.96<br>±1.62  | 23.41<br>±1.77  | 7.14<br>±0.62   | 17.79<br>±0.74  |
|            | AETTA            | 15.34<br>±1.06  | 13.13<br>±1.39 | 12.06<br>±0.89 | 3.15<br>±0.12  | 5.08<br>±0.30   | 3.29<br>±0.04   | 3.18<br>±0.30   | 3.45<br>±0.05   | 3.92<br>±0.27   | 3.51<br>±0.21   | 2.75<br>±0.02   | 5.01<br>±0.15   | 4.15<br>±0.21   | 4.18<br>±0.37   | 5.06<br>±0.57   | 5.82<br>±0.30   |
| RoTTA [36] | SrcValid         | 27.12<br>±7.07  | 26.34<br>±6.79 | 9.26<br>±2.75  | 7.15<br>±1.06  | 24.37<br>±0.72  | 5.96<br>±0.94   | 4.82<br>±1.05   | 4.60<br>±0.29   | 17.57<br>±1.70  | 4.44<br>±0.77   | 4.69<br>±0.63   | 21.73<br>±4.14  | 16.11<br>±0.21  | 8.78<br>±0.75   | 17.58<br>±0.24  | 13.37<br>±0.89  |
|            | SoftmaxScore [7] | 4.68<br>±0.46   | 5.10<br>±0.20  | 5.00<br>±0.09  | 11.86<br>±0.78 | 8.45<br>±0.59   | 13.92<br>±1.06  | 15.37<br>±0.84  | 14.95<br>±0.47  | 15.51<br>±0.36  | 16.15<br>±0.63  | 15.69<br>±0.45  | 15.48<br>±0.47  | 15.65<br>±0.13  | 15.52<br>±0.31  | 15.31<br>±0.30  | 12.57<br>±0.43  |
|            | GDE [21]         | 32.94<br>±0.75  | 27.97<br>±1.10 | 33.95<br>±0.74 | 13.61<br>±0.39 | 28.49<br>±0.73  | 11.81<br>±0.16  | 9.71<br>±0.21   | 13.20<br>±0.20  | 12.86<br>±0.46  | 11.37<br>±0.26  | 7.00<br>±0.28   | 11.11<br>±0.41  | 16.67<br>±0.31  | 13.76<br>±0.19  | 18.09<br>±0.36  | 17.50<br>±0.30  |
|            | AdvPerturb [23]  | 40.38<br>±2.57  | 39.03<br>±3.20 | 40.39<br>±3.88 | 29.63<br>±2.87 | 13.44<br>±2.20  | 18.72<br>±1.44  | 23.67<br>±3.12  | 6.03<br>±0.60   | 17.61<br>±3.15  | 13.01<br>±0.57  | 2.73<br>±0.09   | 53.28<br>±0.74  | 4.84<br>±0.13   | 36.60<br>±1.21  | 4.90<br>±0.44   | 22.95<br>±0.82  |
|            | AETTA            | 13.47<br>±5.78  | 12.40<br>±5.05 | 10.05<br>±3.52 | 3.69<br>±0.21  | 5.45<br>±0.92   | 3.39<br>±0.15   | 3.24<br>±0.16   | 3.67<br>±0.69   | 3.90<br>±0.61   | 3.75<br>±0.44   | 2.77<br>±0.03   | 3.37<br>±0.36   | 4.00<br>±0.14   | 3.48<br>±0.22   | 3.73<br>±0.35   | 5.36<br>±1.22   |
| SoTTA [12] | SrcValid         | 11.98<br>±4.00  | 5.70<br>±1.02  | 9.03<br>±3.17  | 6.60<br>±2.08  | 21.16<br>±1.40  | 6.41<br>±0.73   | 3.82<br>±0.36   | 9.00<br>±1.38   | 5.61<br>±0.97   | 5.74<br>±0.40   | 3.94<br>±0.35   | 15.30<br>±2.22  | 15.65<br>±0.40  | 5.94<br>±0.52   | 15.07<br>±0.88  | 9.40<br>±0.85   |
|            | SoftmaxScore [7] | 4.10<br>±0.13   | 4.13<br>±0.63  | 3.96<br>±0.62  | 4.79<br>±0.18  | 5.39<br>±1.27   | 3.72<br>±0.26   | 4.37<br>±0.89   | 3.67<br>±0.24   | 3.55<br>±0.36   | 4.41<br>±0.53   | 4.39<br>±0.81   | 6.63<br>±0.32   | 3.88<br>±0.22   | 4.35<br>±0.22   | 4.15<br>±0.57   | 4.37<br>±0.09   |
|            | GDE [21]         | 23.46<br>±0.77  | 17.63<br>±0.94 | 24.00<br>±0.97 | 14.12<br>±1.41 | 26.42<br>±1.21  | 15.42<br>±0.99  | 11.27<br>±0.58  | 15.05<br>±0.48  | 14.27<br>±0.48  | 13.33<br>±0.37  | 8.85<br>±0.15   | 15.49<br>±1.19  | 19.61<br>±1.30  | 15.91<br>±1.09  | 20.61<br>±1.00  | 17.03<br>±0.70  |
|            | AdvPerturb [23]  | 47.94<br>±3.36  | 47.49<br>±4.59 | 50.19<br>±5.41 | 26.66<br>±1.29 | 16.53<br>±1.72  | 15.64<br>±0.97  | 21.76<br>±2.19  | 4.96<br>±0.25   | 15.67<br>±3.26  | 10.46<br>±0.47  | 2.61<br>±0.19   | 48.72<br>±0.34  | 4.51<br>±0.34   | 35.66<br>±0.51  | 5.64<br>±0.52   | 23.63<br>±0.78  |
|            | AETTA            | 7.91<br>±1.16   | 5.83<br>±0.56  | 5.76<br>±0.77  | 3.27<br>±0.06  | 4.58<br>±0.11   | 3.57<br>±0.19   | 3.28<br>±0.17   | 3.49<br>±0.10   | 3.66<br>±0.08   | 3.79<br>±0.13   | 2.94<br>±0.02   | 3.81<br>±0.21   | 4.20<br>±0.01   | 4.07<br>±0.07   | 3.87<br>±0.02   | 4.27<br>±0.12   |

Table 11. Mean absolute error (MAE) (%) of the accuracy estimation on continual CIFAR100-C. Averaged over three different random seeds.

| TTA Method | Acc. Estimation  | $t \rightarrow$ |                 |                 |                 |                 |                 |                 |                 |                 |                 |                 |                 |                 |                 |                 | Avg.(↓)         |
|------------|------------------|-----------------|-----------------|-----------------|-----------------|-----------------|-----------------|-----------------|-----------------|-----------------|-----------------|-----------------|-----------------|-----------------|-----------------|-----------------|-----------------|
|            |                  | Gau.            | Shot            | Imp.            | Def.            | Gla.            | Mot.            | Zoom            | Snow            | Fro.            | Fog             | Brit.           | Cont.           | Elas.           | Pix.            | JPEG            |                 |
| TENT [34]  | SrcValid         | 46.38<br>± 1.17 | 32.85<br>± 3.59 | 28.45<br>± 3.99 | 12.51<br>± 0.84 | 16.92<br>± 2.40 | 5.75<br>± 0.60  | 3.84<br>± 0.73  | 3.88<br>± 1.45  | 2.77<br>± 0.87  | 2.32<br>± 0.35  | 2.12<br>± 0.20  | 2.00<br>± 0.13  | 1.87<br>± 0.15  | 1.73<br>± 0.30  | 1.65<br>± 0.26  | 11.00<br>± 0.58 |
|            | SoftmaxScore [7] | 13.70<br>± 0.41 | 5.34<br>± 0.21  | 13.91<br>± 0.58 | 21.16<br>± 0.94 | 38.51<br>± 1.59 | 50.42<br>± 4.50 | 59.40<br>± 6.35 | 70.82<br>± 5.52 | 78.56<br>± 3.43 | 82.11<br>± 1.88 | 84.99<br>± 1.14 | 89.52<br>± 0.24 | 87.46<br>± 1.72 | 88.87<br>± 1.65 | 89.56<br>± 0.63 | 58.29<br>± 1.82 |
|            | GDE [21]         | 49.21<br>± 0.79 | 48.12<br>± 0.60 | 60.77<br>± 0.20 | 56.99<br>± 1.30 | 74.34<br>± 1.15 | 77.88<br>± 4.24 | 82.28<br>± 5.11 | 90.14<br>± 3.30 | 93.71<br>± 1.63 | 95.33<br>± 0.77 | 95.86<br>± 0.45 | 96.93<br>± 0.43 | 96.88<br>± 0.62 | 97.25<br>± 0.75 | 97.31<br>± 0.82 | 80.87<br>± 1.29 |
|            | AdvPerturb [23]  | 36.92<br>± 1.76 | 36.25<br>± 0.61 | 29.26<br>± 1.31 | 13.91<br>± 0.54 | 8.56<br>± 2.77  | 3.79<br>± 0.85  | 3.68<br>± 1.01  | 3.08<br>± 0.81  | 3.96<br>± 2.12  | 2.58<br>± 0.56  | 1.47<br>± 0.13  | 2.10<br>± 0.28  | 2.26<br>± 1.07  | 2.46<br>± 0.66  | 1.53<br>± 0.06  | 10.12<br>± 0.24 |
|            | AETTA            | 6.55<br>± 0.59  | 7.40<br>± 0.10  | 7.52<br>± 0.54  | 13.45<br>± 0.40 | 6.30<br>± 0.56  | 6.87<br>± 0.81  | 8.36<br>± 1.09  | 8.09<br>± 2.80  | 5.08<br>± 1.37  | 3.84<br>± 0.58  | 3.53<br>± 0.33  | 2.97<br>± 0.32  | 2.73<br>± 0.35  | 2.54<br>± 0.51  | 2.51<br>± 0.42  | 5.85<br>± 0.36  |
| EATA [28]  | SrcValid         | 7.65<br>± 0.94  | 1.97<br>± 0.17  | 1.59<br>± 0.33  | 1.47<br>± 0.43  | 1.24<br>± 0.22  | 1.36<br>± 0.26  | 1.31<br>± 0.23  | 1.22<br>± 0.20  | 1.07<br>± 0.10  | 1.01<br>± 0.08  | 0.94<br>± 0.04  | 0.98<br>± 0.11  | 1.13<br>± 0.20  | 1.11<br>± 0.11  | 1.09<br>± 0.10  | 1.68<br>± 0.18  |
|            | SoftmaxScore [7] | 36.65<br>± 1.55 | 64.29<br>± 1.84 | 70.97<br>± 1.45 | 75.02<br>± 1.73 | 77.61<br>± 1.85 | 78.47<br>± 2.34 | 78.46<br>± 0.61 | 79.04<br>± 0.36 | 82.42<br>± 0.71 | 81.35<br>± 0.18 | 84.35<br>± 0.31 | 89.83<br>± 0.75 | 82.75<br>± 0.91 | 83.33<br>± 1.63 | 84.09<br>± 1.09 | 76.58<br>± 0.71 |
|            | GDE [21]         | 83.95<br>± 1.83 | 94.00<br>± 0.88 | 94.99<br>± 0.74 | 94.52<br>± 0.94 | 95.15<br>± 0.50 | 94.73<br>± 1.31 | 94.57<br>± 1.16 | 93.63<br>± 1.11 | 95.31<br>± 1.51 | 95.46<br>± 0.38 | 95.31<br>± 0.51 | 94.60<br>± 1.34 | 94.55<br>± 0.70 | 94.51<br>± 0.48 | 94.81<br>± 1.49 | 94.01<br>± 0.43 |
|            | AdvPerturb [23]  | 9.32<br>± 0.83  | 4.85<br>± 1.55  | 2.07<br>± 0.54  | 1.55<br>± 0.70  | 1.41<br>± 0.20  | 1.31<br>± 0.43  | 1.22<br>± 0.16  | 1.21<br>± 0.52  | 0.88<br>± 0.36  | 0.89<br>± 0.27  | 0.52<br>± 0.07  | 1.08<br>± 0.57  | 0.98<br>± 0.25  | 1.27<br>± 0.22  | 0.93<br>± 0.14  | 1.97<br>± 0.33  |
|            | AETTA            | 18.86<br>± 2.19 | 7.14<br>± 2.67  | 2.59<br>± 0.40  | 4.21<br>± 3.24  | 3.33<br>± 2.13  | 2.64<br>± 1.35  | 2.03<br>± 0.25  | 1.90<br>± 0.14  | 1.78<br>± 0.06  | 1.74<br>± 0.06  | 1.97<br>± 0.34  | 8.42<br>± 10.00 | 2.10<br>± 0.09  | 1.92<br>± 0.10  | 2.04<br>± 0.48  | 4.18<br>± 0.82  |
| SAR [29]   | SrcValid         | 53.44<br>± 0.56 | 44.48<br>± 0.19 | 50.08<br>± 0.66 | 32.15<br>± 0.18 | 47.60<br>± 0.38 | 33.57<br>± 0.57 | 30.57<br>± 0.27 | 38.18<br>± 0.81 | 36.38<br>± 0.46 | 35.00<br>± 0.48 | 27.36<br>± 0.32 | 29.30<br>± 0.55 | 39.09<br>± 0.36 | 33.58<br>± 0.22 | 42.22<br>± 0.34 | 38.20<br>± 0.22 |
|            | SoftmaxScore [7] | 20.82<br>± 0.65 | 23.48<br>± 0.20 | 20.68<br>± 0.05 | 25.76<br>± 0.19 | 21.30<br>± 0.50 | 24.92<br>± 0.54 | 26.40<br>± 0.30 | 23.71<br>± 0.68 | 23.90<br>± 0.26 | 25.12<br>± 0.32 | 26.21<br>± 0.19 | 25.49<br>± 0.24 | 24.85<br>± 0.45 | 25.13<br>± 0.06 | 22.95<br>± 0.60 | 24.05<br>± 0.29 |
|            | GDE [21]         | 53.09<br>± 0.53 | 44.65<br>± 0.17 | 51.31<br>± 0.41 | 33.64<br>± 0.17 | 48.74<br>± 0.41 | 34.68<br>± 0.61 | 31.44<br>± 0.31 | 39.11<br>± 0.72 | 37.62<br>± 0.29 | 36.45<br>± 0.28 | 28.86<br>± 0.08 | 30.48<br>± 0.33 | 40.06<br>± 0.27 | 34.55<br>± 0.24 | 43.42<br>± 0.28 | 39.21<br>± 0.22 |
|            | AdvPerturb [23]  | 35.15<br>± 1.78 | 42.48<br>± 1.22 | 40.57<br>± 0.60 | 29.46<br>± 0.65 | 28.50<br>± 1.19 | 16.57<br>± 0.38 | 23.68<br>± 0.46 | 8.75<br>± 0.68  | 25.17<br>± 0.46 | 18.91<br>± 0.75 | 4.57<br>± 0.42  | 49.75<br>± 0.52 | 5.52<br>± 0.24  | 38.29<br>± 2.90 | 6.54<br>± 0.50  | 24.93<br>± 0.57 |
|            | AETTA            | 5.75<br>± 0.45  | 5.35<br>± 0.22  | 6.31<br>± 0.08  | 6.59<br>± 0.22  | 9.11<br>± 0.29  | 7.66<br>± 0.31  | 6.16<br>± 0.37  | 8.37<br>± 0.47  | 7.06<br>± 0.21  | 6.12<br>± 0.09  | 5.78<br>± 0.30  | 5.65<br>± 0.01  | 6.32<br>± 0.36  | 5.90<br>± 0.35  | 7.93<br>± 0.15  | 6.67<br>± 0.12  |
| CoTTA [35] | SrcValid         | 53.11<br>± 0.39 | 51.92<br>± 0.46 | 57.00<br>± 0.31 | 36.42<br>± 0.36 | 54.13<br>± 0.72 | 39.30<br>± 0.46 | 38.28<br>± 0.42 | 46.48<br>± 0.48 | 46.81<br>± 0.58 | 47.73<br>± 0.89 | 33.94<br>± 0.43 | 44.55<br>± 1.25 | 49.18<br>± 0.38 | 42.97<br>± 0.08 | 49.48<br>± 0.27 | 46.09<br>± 0.38 |
|            | SoftmaxScore [7] | 34.06<br>± 0.49 | 34.58<br>± 0.52 | 32.05<br>± 0.53 | 33.14<br>± 0.76 | 31.92<br>± 0.80 | 34.68<br>± 0.79 | 35.83<br>± 0.82 | 36.94<br>± 1.04 | 37.46<br>± 0.85 | 36.13<br>± 0.91 | 36.94<br>± 1.03 | 40.90<br>± 0.70 | 38.04<br>± 0.86 | 42.67<br>± 0.64 | 38.70<br>± 0.68 | 36.27<br>± 0.68 |
|            | GDE [21]         | 36.44<br>± 0.63 | 36.25<br>± 0.17 | 39.37<br>± 0.40 | 31.48<br>± 0.46 | 40.05<br>± 0.54 | 32.73<br>± 0.55 | 32.12<br>± 0.19 | 34.87<br>± 0.38 | 35.40<br>± 0.79 | 36.28<br>± 0.78 | 31.54<br>± 0.36 | 37.31<br>± 0.43 | 36.98<br>± 0.26 | 32.82<br>± 0.43 | 37.87<br>± 0.69 | 35.43<br>± 0.30 |
|            | AdvPerturb [23]  | 26.80<br>± 0.88 | 26.08<br>± 0.93 | 27.02<br>± 0.54 | 32.75<br>± 0.77 | 11.69<br>± 0.89 | 23.72<br>± 1.09 | 26.36<br>± 0.40 | 5.63<br>± 0.17  | 9.87<br>± 0.12  | 27.10<br>± 0.57 | 4.87<br>± 0.27  | 44.56<br>± 1.41 | 7.57<br>± 0.44  | 14.56<br>± 1.39 | 5.74<br>± 0.25  | 19.62<br>± 0.15 |
|            | AETTA            | 9.24<br>± 0.38  | 8.52<br>± 0.55  | 6.75<br>± 0.35  | 5.20<br>± 0.13  | 5.06<br>± 0.25  | 5.54<br>± 0.16  | 5.70<br>± 0.29  | 5.49<br>± 0.31  | 5.88<br>± 0.33  | 6.71<br>± 0.59  | 7.38<br>± 0.10  | 9.70<br>± 0.72  | 6.33<br>± 0.14  | 5.14<br>± 0.27  | 5.66<br>± 0.45  | 6.55<br>± 0.17  |
| RoTTA [36] | SrcValid         | 28.06<br>± 2.60 | 29.86<br>± 2.79 | 13.52<br>± 1.12 | 22.72<br>± 0.61 | 18.32<br>± 1.73 | 12.14<br>± 0.85 | 5.78<br>± 0.25  | 8.58<br>± 0.39  | 23.32<br>± 0.81 | 10.68<br>± 2.60 | 6.52<br>± 1.30  | 25.88<br>± 4.11 | 33.45<br>± 0.64 | 13.98<br>± 3.80 | 38.61<br>± 0.73 | 19.43<br>± 1.17 |
|            | SoftmaxScore [7] | 18.70<br>± 0.62 | 21.28<br>± 0.40 | 19.45<br>± 0.34 | 28.25<br>± 0.20 | 22.90<br>± 0.62 | 29.05<br>± 0.26 | 31.75<br>± 0.27 | 28.49<br>± 0.44 | 29.37<br>± 0.19 | 30.03<br>± 0.28 | 31.39<br>± 0.69 | 28.52<br>± 0.44 | 30.99<br>± 0.70 | 29.72<br>± 0.36 | 28.03<br>± 0.41 | 27.19<br>± 0.12 |
|            | GDE [21]         | 59.99<br>± 1.07 | 57.35<br>± 0.80 | 61.31<br>± 0.96 | 36.40<br>± 0.92 | 53.91<br>± 0.73 | 34.73<br>± 0.63 | 31.10<br>± 0.63 | 39.01<br>± 0.31 | 37.56<br>± 0.48 | 37.15<br>± 0.45 | 26.90<br>± 0.24 | 33.56<br>± 0.20 | 38.31<br>± 0.64 | 34.69<br>± 0.46 | 43.29<br>± 0.95 | 41.68<br>± 0.45 |
|            | AdvPerturb [23]  | 25.47<br>± 1.49 | 28.60<br>± 0.91 | 27.71<br>± 0.81 | 26.38<br>± 0.74 | 22.80<br>± 1.70 | 15.78<br>± 0.72 | 23.44<br>± 0.96 | 8.93<br>± 0.85  | 24.12<br>± 0.74 | 16.68<br>± 0.95 | 4.56<br>± 0.43  | 44.85<br>± 0.74 | 5.96<br>± 0.33  | 36.17<br>± 3.16 | 6.18<br>± 0.16  | 21.18<br>± 0.71 |
|            | AETTA            | 6.37<br>± 1.21  | 7.00<br>± 0.80  | 4.77<br>± 0.44  | 6.20<br>± 0.32  | 6.54<br>± 0.45  | 5.69<br>± 0.27  | 4.89<br>± 0.24  | 6.59<br>± 0.15  | 4.83<br>± 0.55  | 5.52<br>± 0.25  | 4.78<br>± 0.26  | 7.60<br>± 0.80  | 5.40<br>± 0.16  | 4.92<br>± 0.69  | 6.84<br>± 0.76  | 5.86<br>± 0.10  |
| SoTTA [12] | SrcValid         | 13.43<br>± 2.25 | 8.45<br>± 1.26  | 9.32<br>± 2.50  | 14.85<br>± 2.02 | 23.51<br>± 3.62 | 9.03<br>± 1.89  | 6.22<br>± 1.14  | 26.37<br>± 2.50 | 10.83<br>± 3.76 | 8.66<br>± 1.84  | 20.27<br>± 0.21 | 35.17<br>± 2.57 | 29.05<br>± 3.38 | 14.48<br>± 4.68 | 33.72<br>± 0.71 | 17.56<br>± 1.57 |
|            | SoftmaxScore [7] | 21.66<br>± 0.49 | 22.56<br>± 0.75 | 18.88<br>± 0.55 | 21.70<br>± 0.73 | 18.70<br>± 1.01 | 22.58<br>± 0.47 | 24.48<br>± 0.34 | 21.62<br>± 0.61 | 22.08<br>± 0.10 | 22.18<br>± 0.08 | 23.67<br>± 0.48 | 21.86<br>± 0.55 | 22.45<br>± 0.65 | 22.42<br>± 0.63 | 21.45<br>± 0.49 | 21.89<br>± 0.35 |
|            | GDE [21]         | 41.62<br>± 0.27 | 37.46<br>± 0.91 | 46.03<br>± 0.18 | 33.39<br>± 0.87 | 44.99<br>± 1.03 | 32.05<br>± 0.66 | 28.16<br>± 0.28 | 35.19<br>± 0.80 | 33.80<br>± 0.28 | 32.74<br>± 0.13 | 26.34<br>± 0.48 | 29.23<br>± 0.80 | 37.40<br>± 0.78 | 31.99<br>± 1.11 | 38.42<br>± 0.57 | 35.25<br>± 0.27 |
|            | AdvPerturb [23]  | 41.39<br>± 1.33 | 45.03<br>± 0.81 | 40.28<br>± 1.21 | 25.84<br>± 0.41 | 26.78<br>± 1.90 | 16.58<br>± 0.85 | 23.72<br>± 0.36 | 9.68<br>± 0.69  | 24.71<br>± 0.74 | 19.14<br>± 0.83 | 4.52<br>± 0.20  | 47.12<br>± 1.27 | 5.70<br>± 0.02  | 37.97<br>± 2.21 | 8.41<br>± 0.72  | 25.12<br>± 0.39 |
|            | AETTA            | 8.11<br>± 0.91  | 7.19<br>± 0.44  | 7.34<br>± 0.79  | 4.99<br>± 0.31  | 4.97<br>± 0.25  | 4.30<br>± 0.19  | 4.33<br>± 0.14  | 4.86<br>± 0.24  | 4.90<br>± 0.34  | 5.23<br>± 0.46  | 4.24<br>± 0.19  | 5.20<br>± 0.32  | 4.61<br>± 0.10  | 5.01<br>± 0.27  | 4.58<br>± 0.13  | 5.32<br>± 0.18  |

Table 12. Mean absolute error (MAE) (%) of the accuracy estimation on continual ImageNet-C. Averaged over three different random seeds.

| TTA Method | Acc. Estimation  | $t \rightarrow$ |                |                |                |                |                |                |                |                |                |                |                |                |                |                | Avg.(↓)        |
|------------|------------------|-----------------|----------------|----------------|----------------|----------------|----------------|----------------|----------------|----------------|----------------|----------------|----------------|----------------|----------------|----------------|----------------|
|            |                  | Gau.            | Shot           | Imp.           | Def.           | Gla.           | Mot.           | Zoom           | Snow           | Fro.           | Fog            | Brit.          | Cont.          | Elas.          | Pix.           | JPEG           |                |
| TENT [34]  | SrcValid         | 53.54<br>±1.08  | 48.82<br>±1.21 | 47.13<br>±1.16 | 48.84<br>±1.07 | 44.94<br>±1.16 | 34.83<br>±1.25 | 26.16<br>±1.18 | 32.41<br>±1.21 | 31.80<br>±1.02 | 21.17<br>±1.05 | 8.93<br>±0.73  | 43.25<br>±0.72 | 20.57<br>±0.66 | 17.02<br>±0.49 | 20.10<br>±0.27 | 33.30<br>±0.93 |
|            | SoftmaxScore [7] | 11.11<br>±0.14  | 13.76<br>±0.03 | 14.42<br>±0.09 | 11.60<br>±0.01 | 13.15<br>±0.12 | 19.04<br>±0.18 | 24.78<br>±0.06 | 19.82<br>±0.06 | 19.35<br>±0.11 | 26.70<br>±0.07 | 28.68<br>±0.08 | 9.97<br>±0.05  | 25.38<br>±0.09 | 26.50<br>±0.13 | 25.86<br>±0.07 | 19.34<br>±0.02 |
|            | GDE [21]         | 85.03<br>±0.14  | 80.80<br>±0.02 | 79.82<br>±0.06 | 82.06<br>±0.02 | 79.46<br>±0.13 | 70.43<br>±0.17 | 61.92<br>±0.06 | 68.34<br>±0.08 | 68.10<br>±0.10 | 57.45<br>±0.07 | 44.38<br>±0.07 | 79.03<br>±0.07 | 57.35<br>±0.07 | 53.54<br>±0.08 | 56.74<br>±0.08 | 68.30<br>±0.01 |
|            | AdvPerturb [23]  | 13.38<br>±0.12  | 16.92<br>±0.07 | 18.51<br>±0.08 | 5.92<br>±0.07  | 9.30<br>±0.16  | 15.03<br>±0.20 | 14.79<br>±0.06 | 18.37<br>±0.09 | 12.01<br>±0.04 | 26.75<br>±0.06 | 5.86<br>±0.09  | 17.02<br>±0.05 | 21.98<br>±0.12 | 18.40<br>±0.10 | 8.03<br>±0.09  | 14.82<br>±0.02 |
|            | AETTA            | 4.88<br>±0.10   | 4.53<br>±0.06  | 5.19<br>±0.22  | 8.64<br>±0.11  | 5.99<br>±0.06  | 5.60<br>±0.25  | 4.74<br>±0.16  | 5.75<br>±0.20  | 4.81<br>±0.07  | 6.50<br>±0.13  | 5.62<br>±0.12  | 6.85<br>±0.13  | 5.43<br>±0.19  | 5.27<br>±0.12  | 5.12<br>±0.15  | 5.66<br>±0.05  |
| EATA [28]  | SrcValid         | 50.34<br>±1.01  | 48.73<br>±0.91 | 49.54<br>±0.80 | 51.63<br>±0.70 | 50.92<br>±0.57 | 39.99<br>±0.75 | 30.20<br>±1.06 | 34.05<br>±0.72 | 36.29<br>±0.69 | 23.21<br>±0.59 | 9.74<br>±0.59  | 49.05<br>±0.79 | 25.37<br>±0.63 | 20.56<br>±0.80 | 26.64<br>±0.92 | 36.42<br>±0.76 |
|            | SoftmaxScore [7] | 12.31<br>±0.08  | 12.95<br>±0.12 | 12.55<br>±0.06 | 10.51<br>±0.20 | 10.60<br>±0.07 | 19.20<br>±0.17 | 26.02<br>±0.02 | 22.11<br>±0.06 | 20.15<br>±0.11 | 29.26<br>±0.11 | 31.42<br>±0.05 | 11.22<br>±0.46 | 27.09<br>±0.14 | 29.88<br>±0.08 | 27.14<br>±0.07 | 20.16<br>±0.05 |
|            | GDE [21]         | 81.21<br>±0.16  | 80.02<br>±0.13 | 80.73<br>±0.07 | 76.16<br>±0.24 | 77.51<br>±0.44 | 69.92<br>±0.12 | 61.37<br>±0.06 | 65.81<br>±0.11 | 68.10<br>±0.07 | 54.61<br>±0.10 | 41.10<br>±0.05 | 74.94<br>±0.60 | 57.03<br>±0.17 | 51.96<br>±0.08 | 58.28<br>±0.06 | 66.58<br>±0.03 |
|            | AdvPerturb [23]  | 15.44<br>±0.07  | 16.25<br>±0.13 | 15.88<br>±0.10 | 5.13<br>±0.06  | 6.00<br>±0.03  | 13.33<br>±0.14 | 13.52<br>±0.19 | 19.48<br>±0.04 | 10.13<br>±0.08 | 28.15<br>±0.04 | 6.26<br>±0.18  | 15.43<br>±0.63 | 20.22<br>±0.19 | 20.08<br>±0.17 | 6.95<br>±0.11  | 14.15<br>±0.06 |
|            | AETTA            | 5.28<br>±0.12   | 4.75<br>±0.05  | 5.43<br>±0.05  | 7.19<br>±0.11  | 4.93<br>±0.06  | 4.28<br>±0.10  | 5.39<br>±0.18  | 4.53<br>±0.09  | 5.01<br>±0.06  | 11.19<br>±0.08 | 10.40<br>±0.13 | 4.79<br>±0.20  | 8.85<br>±0.21  | 10.46<br>±0.22 | 8.41<br>±0.07  | 6.73<br>±0.03  |
| SAR [29]   | SrcValid         | 39.53<br>±1.22  | 26.07<br>±1.15 | 24.30<br>±1.02 | 33.06<br>±0.50 | 26.55<br>±1.30 | 23.04<br>±0.42 | 18.50<br>±0.11 | 24.48<br>±0.14 | 24.45<br>±0.62 | 15.04<br>±0.55 | 6.99<br>±0.44  | 32.56<br>±0.97 | 14.51<br>±1.34 | 11.73<br>±0.83 | 13.62<br>±0.68 | 22.30<br>±0.55 |
|            | SoftmaxScore [7] | 18.07<br>±0.26  | 22.21<br>±0.25 | 21.62<br>±0.20 | 13.92<br>±0.16 | 16.91<br>±0.29 | 19.36<br>±0.28 | 23.96<br>±0.21 | 20.32<br>±0.16 | 20.23<br>±0.08 | 27.65<br>±0.07 | 29.54<br>±0.02 | 11.81<br>±0.70 | 26.78<br>±0.17 | 28.10<br>±0.06 | 28.13<br>±0.07 | 21.91<br>±0.16 |
|            | GDE [21]         | 75.10<br>±0.28  | 67.51<br>±0.30 | 68.29<br>±0.23 | 77.94<br>±0.10 | 73.27<br>±0.31 | 69.21<br>±0.32 | 62.70<br>±0.22 | 67.53<br>±0.16 | 66.89<br>±0.10 | 55.50<br>±0.09 | 45.27<br>±0.05 | 73.24<br>±0.29 | 56.67<br>±0.16 | 51.98<br>±0.09 | 54.24<br>±0.09 | 64.36<br>±0.15 |
|            | AdvPerturb [23]  | 22.95<br>±0.27  | 30.05<br>±0.34 | 30.19<br>±0.24 | 7.97<br>±0.03  | 16.05<br>±0.38 | 17.26<br>±0.23 | 16.44<br>±0.14 | 20.51<br>±0.21 | 14.11<br>±0.12 | 28.50<br>±0.04 | 5.37<br>±0.20  | 22.67<br>±0.25 | 24.31<br>±0.11 | 20.91<br>±0.10 | 10.33<br>±0.17 | 19.17<br>±0.14 |
|            | AETTA            | 5.38<br>±0.27   | 4.83<br>±0.05  | 4.67<br>±0.12  | 13.98<br>±0.07 | 9.91<br>±0.30  | 9.50<br>±0.15  | 6.54<br>±0.15  | 7.50<br>±0.05  | 5.88<br>±0.14  | 5.58<br>±0.11  | 4.96<br>±0.02  | 6.59<br>±0.11  | 4.97<br>±0.01  | 5.01<br>±0.06  | 4.94<br>±0.02  | 6.68<br>±0.04  |
| CoTTA [35] | SrcValid         | 55.20<br>±0.50  | 54.08<br>±0.55 | 54.85<br>±0.50 | 56.48<br>±0.54 | 55.35<br>±0.61 | 45.25<br>±0.55 | 34.90<br>±0.55 | 39.10<br>±0.60 | 40.10<br>±0.57 | 27.96<br>±0.51 | 10.73<br>±0.40 | 56.36<br>±0.45 | 29.61<br>±0.71 | 24.28<br>±0.56 | 31.70<br>±0.66 | 41.06<br>±0.54 |
|            | SoftmaxScore [7] | 9.92<br>±0.07   | 10.66<br>±0.11 | 10.25<br>±0.03 | 8.45<br>±0.02  | 9.39<br>±0.03  | 17.61<br>±0.12 | 25.68<br>±0.05 | 21.49<br>±0.12 | 20.60<br>±0.10 | 30.40<br>±0.06 | 35.08<br>±0.08 | 7.74<br>±0.18  | 28.08<br>±0.08 | 31.71<br>±0.09 | 27.43<br>±0.07 | 19.63<br>±0.01 |
|            | GDE [21]         | 86.92<br>±0.11  | 85.84<br>±0.09 | 86.59<br>±0.05 | 88.22<br>±0.10 | 87.15<br>±0.11 | 77.00<br>±0.10 | 66.67<br>±0.08 | 70.86<br>±0.17 | 71.83<br>±0.17 | 59.67<br>±0.13 | 42.25<br>±0.07 | 88.09<br>±0.04 | 61.51<br>±0.10 | 56.11<br>±0.10 | 63.50<br>±0.14 | 72.81<br>±0.07 |
|            | AdvPerturb [23]  | 11.72<br>±0.07  | 12.20<br>±0.09 | 11.85<br>±0.03 | 3.88<br>±0.15  | 4.36<br>±0.10  | 9.61<br>±0.09  | 9.48<br>±0.11  | 15.52<br>±0.17 | 7.89<br>±0.14  | 24.08<br>±0.08 | 6.72<br>±0.21  | 9.07<br>±0.17  | 15.97<br>±0.09 | 17.59<br>±0.15 | 5.98<br>±0.33  | 11.06<br>±0.02 |
|            | AETTA            | 4.75<br>±0.07   | 4.01<br>±0.03  | 4.80<br>±0.07  | 7.44<br>±0.20  | 5.06<br>±0.22  | 4.66<br>±0.06  | 4.51<br>±0.13  | 4.42<br>±0.03  | 4.24<br>±0.08  | 8.98<br>±0.13  | 8.83<br>±0.09  | 6.46<br>±0.44  | 6.96<br>±0.07  | 8.36<br>±0.24  | 6.26<br>±0.19  | 5.98<br>±0.04  |
| RoTTA [36] | SrcValid         | 15.32<br>±0.10  | 18.63<br>±0.24 | 21.33<br>±0.24 | 7.87<br>±0.64  | 4.26<br>±0.10  | 4.70<br>±0.33  | 9.33<br>±0.78  | 7.02<br>±0.35  | 4.60<br>±0.14  | 7.37<br>±0.56  | 5.56<br>±0.51  | 19.87<br>±3.35 | 5.95<br>±0.65  | 5.32<br>±0.25  | 6.34<br>±0.60  | 9.56<br>±0.26  |
|            | SoftmaxScore [7] | 11.98<br>±0.07  | 16.57<br>±0.16 | 17.30<br>±0.14 | 13.34<br>±0.22 | 16.79<br>±0.35 | 17.72<br>±0.39 | 20.62<br>±0.14 | 17.70<br>±0.17 | 17.19<br>±0.08 | 18.56<br>±0.23 | 26.66<br>±0.07 | 7.63<br>±1.41  | 21.56<br>±0.24 | 20.65<br>±0.15 | 19.14<br>±0.11 | 17.56<br>±0.08 |
|            | GDE [21]         | 80.31<br>±0.05  | 75.64<br>±0.34 | 75.58<br>±0.12 | 78.75<br>±0.45 | 75.50<br>±0.41 | 73.86<br>±0.52 | 70.37<br>±0.27 | 73.65<br>±0.16 | 73.73<br>±0.24 | 73.21<br>±0.33 | 60.84<br>±0.08 | 85.80<br>±2.29 | 68.56<br>±0.12 | 69.35<br>±0.37 | 71.30<br>±0.26 | 73.76<br>±0.22 |
|            | AdvPerturb [23]  | 13.96<br>±0.07  | 18.59<br>±0.21 | 20.19<br>±0.19 | 6.39<br>±0.09  | 12.37<br>±0.49 | 10.70<br>±0.43 | 9.35<br>±0.04  | 12.77<br>±0.09 | 9.00<br>±0.05  | 12.01<br>±0.13 | 4.08<br>±0.04  | 9.25<br>±1.09  | 15.19<br>±0.13 | 7.64<br>±0.24  | 4.28<br>±0.21  | 11.05<br>±0.05 |
|            | AETTA            | 14.33<br>±0.14  | 12.64<br>±0.40 | 9.38<br>±0.71  | 7.12<br>±0.97  | 5.32<br>±0.83  | 6.73<br>±0.13  | 9.97<br>±0.43  | 14.78<br>±0.30 | 13.99<br>±0.19 | 10.84<br>±0.07 | 12.30<br>±0.07 | 11.51<br>±2.42 | 11.92<br>±0.35 | 11.48<br>±1.03 | 15.47<br>±0.56 | 11.19<br>±0.12 |
| SoTTA [12] | SrcValid         | 28.39<br>±0.39  | 24.64<br>±2.41 | 21.33<br>±2.05 | 11.91<br>±0.91 | 6.16<br>±0.22  | 12.34<br>±1.06 | 7.23<br>±1.43  | 14.57<br>±1.82 | 8.24<br>±0.60  | 19.17<br>±0.97 | 9.67<br>±0.83  | 23.36<br>±1.46 | 11.31<br>±0.68 | 9.89<br>±0.84  | 5.92<br>±0.43  | 14.28<br>±0.28 |
|            | SoftmaxScore [7] | 19.01<br>±0.14  | 20.35<br>±0.14 | 19.30<br>±0.32 | 10.82<br>±0.52 | 10.91<br>±1.19 | 11.64<br>±2.29 | 19.47<br>±1.35 | 20.00<br>±0.74 | 19.98<br>±0.16 | 27.16<br>±0.13 | 28.53<br>±0.16 | 6.86<br>±0.57  | 25.73<br>±0.50 | 27.97<br>±0.24 | 27.39<br>±0.25 | 19.67<br>±0.50 |
|            | GDE [21]         | 62.46<br>±0.16  | 58.40<br>±0.17 | 59.83<br>±0.27 | 68.57<br>±0.46 | 67.82<br>±1.14 | 65.51<br>±2.04 | 56.52<br>±1.44 | 56.27<br>±0.64 | 57.53<br>±0.16 | 44.74<br>±0.34 | 38.05<br>±0.20 | 63.36<br>±0.63 | 48.33<br>±0.37 | 43.13<br>±0.26 | 45.89<br>±0.28 | 55.76<br>±0.45 |
|            | AdvPerturb [23]  | 27.73<br>±0.10  | 31.55<br>±0.15 | 30.82<br>±0.31 | 9.56<br>±0.42  | 14.54<br>±0.85 | 14.59<br>±1.72 | 17.39<br>±0.85 | 24.67<br>±0.45 | 16.20<br>±0.32 | 33.31<br>±0.21 | 5.19<br>±0.08  | 23.24<br>±0.93 | 27.07<br>±0.24 | 24.12<br>±0.30 | 12.45<br>±0.09 | 20.83<br>±0.39 |
|            | AETTA            | 17.92<br>±0.25  | 16.51<br>±0.62 | 18.41<br>±0.09 | 20.63<br>±0.51 | 16.50<br>±0.53 | 18.76<br>±4.82 | 16.27<br>±4.31 | 18.90<br>±1.16 | 19.99<br>±1.58 | 25.06<br>±1.90 | 21.37<br>±1.10 | 19.28<br>±1.51 | 17.33<br>±1.16 | 23.02<br>±1.12 | 18.30<br>±0.88 | 19.22<br>±0.79 |
